## Research Article

**Title: A functional topography within the cholinergic basal forebrain for processing sensory cues associated with reward and punishment**

**Author names and affiliations:** Blaise Robert<sup>1</sup>, Eyal Y. Kimchi<sup>1,2</sup>, Yurika Watanabe<sup>1</sup>, Tatenda Chakoma<sup>1</sup>, Miao Jing<sup>3</sup>, Yulong Li<sup>4</sup>, and Daniel B. Polley<sup>\*1,5</sup>

- 1- Eaton-Peabody Laboratories, Massachusetts Eye and Ear Infirmary, Boston MA 02114 USA
- 2- Dept. Neurology, Massachusetts General Hospital, Boston MA 02114
- 3- Chinese Institute for Brain Research, Beijing 102206, China.
- 4- State Key Laboratory of Membrane Biology, Peking University School of Life Sciences; PKU-IDG/McGovern Institute for Brain Research; Peking-Tsinghua Center for Life Sciences, Beijing 100871, China
- 5- Dept. Otolaryngology - Head and Neck Surgery, Harvard Medical School, Boston MA 02114 USA

\* Corresponding author and Lead Contact

\*Correspondence: [daniel\\_polley@meei.harvard.edu](mailto:daniel_polley@meei.harvard.edu)

**Keywords:** acetylcholine; cholinergic; basal forebrain; nucleus basalis; horizontal limb diagonal band; substantia innominata; reward; punishment; learning; auditory

## Abstract

Basal forebrain cholinergic neurons (BFCNs) project throughout the cortex to regulate arousal, stimulus salience, plasticity, and learning. The basal forebrain features distinct connectivity along its anteroposterior axis that could impart regional differences in feature processing. Here, we simultaneously measured bulk BFCN activity from an anterior structure, the horizontal limb of the diagonal band (HDB), and from the posterior tail of the basal forebrain in globus pallidus and substantia innominata (GP/SI) over a 30-day period as mice learned a sensory reversal task. Although HDB and GP/SI responses were similar for many features, HDB more closely tracked fluctuations in pupil-indexed brain state and exhibited stronger responses to reward omission than to delivery of anticipated awards. In GP/SI, BFCNs were strongly activated by sound, and this response was further enhanced for punishment-predicting – but not reward-predicting – cues. These results identify a functional topography that diversifies cholinergic modulatory signals broadcast to downstream brain regions.

## Introduction

Basal forebrain projections innervate the neocortex, hippocampus, and amygdala to regulate stimulus salience and global brain state across a wide range of timescales (for recent reviews see (Disney and Higley, 2020; Monosov, 2020; Sarter and Lustig, 2020)). The basal forebrain is not a monolithic structure, but rather a constellation of discrete brain areas that feature distinct combinations of neurochemical cell types and distinct arrangements of afferent and efferent connections (Gielow and Zaborszky, 2017; Li et al., 2018; Rye et al., 1984; Zaborszky et al., 2012). Any single region of the basal forebrain is composed of glutamatergic, GABAergic, and cholinergic neurons, which generally share the same sources of input but can vary widely between cell types both in their downstream targeting and functional response properties (Do et al., 2016; Laszlovszky et al., 2020; Yang et al., 2017). As a whole, the basal forebrain is understood to contribute to learning, memory, attention, arousal, and neurodegenerative disease processes (Everitt and Robbins, 1997; Monosov, 2020; Zaborszky et al., 2012). However, the heterogeneity of cell types and projection targets have made it challenging to identify specific computations or specialized feature processing performed by “the” basal forebrain, underscoring the need for cell type-specific recordings from targeted regions in task-engaged animals.

Basal forebrain cholinergic neurons (BFCNs), though numerically the rarest major neurochemical class of basal forebrain neuron (Gritti et al., 2006), are by the far the most extensively studied. In rats and mice, where cholinergic neurons can be accessed for tracing, monitoring and manipulation with transgenic approaches, BFCNs exhibit distinct arrangements of afferent and efferent connections along the extended rostrocaudal axis (Gielow and Zaborszky, 2017). BFCNs in a rostral structure, such as the horizontal limb of the diagonal band of Broca (HDB) feature strong reciprocal connectivity with prefrontal cortex and lateral hypothalamus, with additional projections to entorhinal cortex, olfactory bulb, and pyriform cortex (Bloem et al., 2014; Gielow and Zaborszky, 2017; Li et al., 2018; Rye et al., 1984; Zaborszky et al., 2012) (**Figure 1a**). By contrast, BFCNs at the caudal tail of the basal

44 forebrain, at the intersection of globus pallidus and substantia innominata (GP/Sl), receive  
45 strong inputs from the caudate putamen, the medial geniculate and posterior intrathalamic  
46 nuclei, and are the primary source of cholinergic input to the auditory cortex (ACtx), with  
47 comparatively weak projections to frontal cortical areas (Chavez and Zaborszky, 2017; Guo et  
48 al., 2019; Kamke et al., 2005; Rye et al., 1984; Zaborszky et al., 2012).

49  
50 Although rostral and caudal BFCNs are wired into distinct anatomical networks, the suggestion  
51 is that they broadcast a relatively unified signal to downstream brain areas. The evidence for  
52 this conclusion primarily comes from two types of measurements. First, whether from HDB  
53 (~0.5 – 0.8 mm rostral to bregma in mouse), an intermediate caudal area such as nucleus  
54 basalis (~0.9 – 0.5 mm caudal to bregma), or the caudal extreme GP/Sl (~1.5mm caudal to  
55 bregma), and whether documented with optogenetically targeted single BFCN unit spiking or  
56 population-based calcium signals, all studies have emphasized strong, short-latency  
57 responses to aversive stimuli such as air puffs or foot shock (HDB - (Hangya et al., 2015;  
58 Harrison et al., 2016; Laszlovszky et al., 2020; Sturgill et al., 2020); nucleus basalis - (Hangya  
59 et al., 2015; Laszlovszky et al., 2020; Letzkus et al., 2011); GP/Sl - (Guo et al., 2019)).  
60 Second, cortical fluorescence imaging of genetically encoded acetylcholine (ACh) sensors or  
61 calcium signals in BFCN axons have demonstrated a strong correspondence between  
62 cholinergic activity and behavioral indices of global arousal, as determined from EEG markers,  
63 iso-luminous pupil diameter changes, and gross motor markers such as grooming or  
64 locomotion (ACh sensor imaging - (Lohani et al., 2020; Teles-Grilo Ruivo et al., 2017); Calcium  
65 imaging for HDB - (Harrison et al., 2016; Sturgill et al., 2020), nucleus basalis - (Reimer et al.,  
66 2016), GP/Sl - (Nelson and Mooney, 2016)).

67  
68 On the other hand, there are many differences and inconsistencies in the emerging BFCN  
69 literature, which could point towards interesting differences in the anatomical source of  
70 measured signals, or else could arise from differences in mouse lines, behavioral task designs,  
71 and measurement techniques. For example, auditory cue-evoked BFCN responses have been  
72 described as absent altogether (Hangya et al., 2015), observed only for reward-predictive  
73 sounds (Crouse et al., 2020; Harrison et al., 2016; Kuchibhotla et al., 2017; Parikh et al.,  
74 2007), or enhanced after auditory learning but present even for unconditioned stimuli (Guo et  
75 al., 2019). Similarly, behavioral accuracy in discrimination tasks have been classified from  
76 BFCN activity both preceding and following the auditory cue (Kuchibhotla et al., 2017; Parikh  
77 et al., 2007), only from the post-cue response period (Laszlovszky et al., 2020; Sturgill et al.,  
78 2020), or only from putative non-cholinergic cell types (Hangya et al., 2015; Lin and Nicolelis,  
79 2008). Reward-evoked BFCN activity has been described as weak overall (Crouse et al., 2020;  
80 Harrison et al., 2016; Parikh et al., 2007) or rapid and quite strong, particularly for uncertain  
81 rewards (Hangya et al., 2015; Laszlovszky et al., 2020; Sturgill et al., 2020; Teles-Grilo Ruivo  
82 et al., 2017). Finally, the relationship between BFCN activity and movement is unclear, with  
83 some studies reporting strong recruitment by orofacial movements or locomotion occurring  
84 outside of a behavioral task (Harrison et al., 2016; Nelson and Mooney, 2016), strong only for  
85 movements that linked to reinforcement (Crouse et al., 2020), or absent, whether movements  
86 were linked to reinforcement or not (Hangya et al., 2015; Parikh et al., 2007).

87

88 To better understand whether there are regional functional specializations within the basal  
89 forebrain, we developed an approach to minimize inter-subject variation by testing all of the  
90 experimental features mentioned above in each individual mouse while making simultaneous  
91 fiber-based bulk GCaMP recordings from BFCNs in HDB and GP/Sl. For some variables, we  
92 observed closely matched responses in rostral and caudal regions, suggesting a common  
93 output that would be broadcast to downstream brain regions: both HDB and GP/Sl exhibited  
94 equivalently strong adaptation to sensory novelty and equivalently weak overall responses to  
95 unconditioned visual stimuli, anticipated rewards, and neither region exhibited evidence of  
96 learning-related enhancement of reward-predictive auditory cues. For other measures, we  
97 noted clear differences between BFCN activity in each region: HDB exhibited a comparatively  
98 strong association with pupil-indexed brain state, behavioral trial outcome, and with the  
99 omission of expected rewards. Although BFCNs in both regions showed strong responses to  
100 punishment, responses were larger in GP/Sl, as were responses to orofacial movements,  
101 unconditioned auditory stimuli, and learning-related enhancement of punishment-predicting  
102 auditory cues. These findings identify a coarse functional topography within the cholinergic  
103 basal forebrain that can be interpreted in light of the distinct connectivity of each region and will  
104 motivate future hypotheses about the causal involvement of each region in brain function and  
105 behavior.

106

107

108

## Results

109 To characterize regional specializations within the cholinergic basal forebrain across a wide  
110 range of task-related variables, we performed dual fiber imaging from HDB and GP/Sl in the  
111 right hemisphere of Chat-Cre mice that were crossed to the GCaMP6f reporter line, Ai148  
112 (**Figure 1B-C**). We confirmed that GCaMP expression was almost entirely restricted to  
113 cholinergic neurons within the HDB and GP/Sl by immunolabeling regions near the end of the  
114 fiber tip for ChAT in a subset of implanted mice (N=4). ChAT- expressing GCaMP neurons  
115 were rare, amounting to just 95/1719 in HDB (5.5%) and 48/764 in GP/Sl (6.3%) (**Figure 1D**).  
116 Therefore, at least for the two regions of the basal forebrain characterized here, our transgenic  
117 strategy was appropriate for long-term calcium imaging in cholinergic basal forebrain neurons.

118

### **Strong coherence between pupil-indexed arousal and cholinergic activity**

119 Basal forebrain neurons have a well-established role in regulating global brain state (Buzsaki  
120 et al., 1988; Kim et al., 2015; Yang et al., 2017). The cholinergic basal forebrain, in particular,  
121 is a key regulator of neocortical excitability across sleep states as well as levels of vigilance  
122 during quiescent awake states (Buzsaki et al., 1988; Everitt and Robbins, 1997; McGinley et  
123 al., 2015a; Reimer et al., 2016; Teles-Grilo Ruivo et al., 2017). Under iso-luminous lighting  
124 conditions, pupil diameter provides a sensitive index of arousal and has been shown to co-vary  
125 with GCaMP activity measured in cholinergic basal forebrain axon fields within the neocortex  
126 (Nelson and Mooney, 2016; Reimer et al., 2016). Prior measurements were either made in  
127 ChAT-Cre × GCaMP reporter lines or via relatively large viral solution injection quantities (0.4 –  
128 1  $\mu$ L), which leaves unresolved the question of how the activity of cholinergic neurons in  
129

130 specific regions of the basal forebrain corresponds to pupil-indexed arousal state. To address  
131 this point, we simultaneously monitored spontaneous pupil fluctuations alongside fiber-based  
132 GCaMP imaging from HDB and GP/Sl. We observed a striking correspondence between  
133 spontaneous pupil dilations and slow fluctuations in GCaMP signal amplitudes in both regions  
134 of the basal forebrain (**Figure 1E**). GCaMP coherence with pupil fluctuations was significantly  
135 higher in HDB than GP/Sl, where bulk calcium dynamics could account for as much as 80% of  
136 the variability in slow pupil changes (**Figure 1F**, statistical reporting provided in figure legends).  
137 The timing of correlated GCaMP transients and pupil dilations were similar across brain areas,  
138 where GCaMP signals led pupil dilations by approximately 0.7s (**Figure 1G**).

139  
140 One of the underlying assumptions in our approach is that bulk calcium imaging from ChAT-  
141 Cre neurons in the basal forebrain is a useful way to measure the suprathreshold activity of  
142 local BFCNs and infer the timing of ACh release in downstream targets. For example, based  
143 on the correspondence between basal forebrain bulk GCaMP levels and pupil diameter, it  
144 would be reasonable to hypothesize that ACh levels also co-vary with pupil dilations with a  
145 similar coherence. HDB and GP/Sl BFCNs both project to ACtx, although BFCN → ACtx  
146 projections are far more numerous in GP/Sl than HDB (Chavez and Zaborszky, 2017; Guo et  
147 al., 2019; Kamke et al., 2005; Rye et al., 1984). To monitor ACh dynamics in ACtx related to  
148 pupil fluctuations, we expressed the genetically encoded ACh fluorescent sensor, GRAB<sub>ACh</sub>3.0,  
149 (ACh3.0), in ACtx neurons and monitored fluorescence dynamic with tapered optical fibers  
150 (**Figure 1H**) (Jing et al., 2020; Pisano et al., 2019). As expected, coherence between ACtx  
151 ACh3.0 fluorescence and pupil fluctuations strongly resembled GCaMP coherence from GP/Sl  
152 cell bodies, both in terms of the strong coherence with slow (< 0.1 Hz) changes in pupil  
153 diameter (**Figure 1I**) and in terms of timing, where ACh3.0 signal surges led pupil dilations by  
154 approximately 0.6s (**Figure 1J**). These findings validate our use of bulk fiber-based calcium  
155 imaging in the GCaMP reporter line as a useful way to monitor cholinergic basal forebrain  
156 activity and additionally demonstrate a strong correspondence between pupil-indexed arousal  
157 and activity surges in HDB and – to a lesser extent – GP/Sl.

## 158 159 **Encoding and habituation for auditory and visual stimuli in the cholinergic basal** 160 **forebrain**

161 Having confirmed that our dual fiber bulk GCaMP imaging approach could capture the  
162 expected relationship between pupil-indexed brain state and cortical ACh levels, we next  
163 tested regional variations in BFCN responses for unconditioned auditory and visual stimuli that  
164 had no explicit behavioral significance (**Figure 2A**). As illustrated in an example mouse,  
165 auditory spectrotemporal gratings elicited robust responses from GP/Sl but not HDB, whereas  
166 drifting visual gratings evoked modest responses from both regions (**Figure 2B**). Quantification  
167 of visual- and sound-evoked responses across all mice (N=11) revealed relatively weak  
168 visually evoked responses that were limited to the highest stimulus contrast in both HDB  
169 (**Figure 2C**) and GP/Sl (**Figure 2D**). Sound-evoked responses increased monotonically with  
170 sound intensity and were significantly greater overall compared to visually evoked responses,  
171 but this difference was primarily driven by GP/Sl, where auditory inputs have the unusual  
172 distinction of eliciting strong, rapid responses prior to behavioral conditioning, as described



173 previously in optogenetically identified cholinergic neurons (Guo et al., 2019) and unidentified  
174 unit recordings (Chernyshev and Weinberger, 1998; Guo et al., 2019; Maho et al., 1995).

175  
176 Spontaneous pupil dilations (Fig. 1) can reflect a heightened arousal state, but pupil dilations can  
177 also be elicited by sounds that are novel, emotionally evocative, or require heightened listening  
178 effort (Becket Ebitz and Moore, 2019; Zekveld et al., 2018). Along these lines, we observed  
179 large pupil dilations to the first presentation of an auditory spectrotemporal gratings, which then  
180 habituated to approximately 50% of their initial amplitude after one or two trials, presumably  
181 reflecting the loss of stimulus novelty (**Figure 2E**). Sound-evoked BFCN responses decayed in  
182 parallel with pupil responses, where responses decreased by approximately 30% after the first  
183 presentation before stabilizing at approximately 60% of the initial amplitude across subsequent  
184 presentations. Although the sound-evoked response amplitude was greater overall in GP/SI  
185 than HDB, the proportional decay with habituation was equivalent (**Figure 2F**). To control for  
186 the possibility that the progressive response decay reflected photobleaching of the sample or  
187 another source of measurement noise, we also quantified the amplitude of spontaneous  
188 GCaMP transients measured during the “nothing” trials in which neither an auditory nor visual  
189 stimuli were presented. The amplitude of spontaneous GCaMP transients was stable  
190 throughout the recording period, confirming that the reduced sensory-evoked GCaMP  
191 responses over the course of 20 blocks reflected habituation to stimulus novelty (**Figure 2G**).

192  
193 **BFCN cue responses co-vary with behavioral accuracy but not learned reward outcome**

194 Whereas BFCN responses to neutral, unconditioned sensory stimuli vary by stimulus modality  
195 and region, several prior studies have described a progressive enhancement in BFCN  
196 responses to tones associated with reward (Crouse et al., 2020; Harrison et al., 2016;  
197 Kuchibhotla et al., 2017; Parikh et al., 2007). Apart from learning-related increases in cue-  
198 evoked responses, variations in baseline activity rates or cue-evoked responses amplitudes  
199 have also been clearly linked to behavioral performance accuracy in sensory detection and  
200 recognition tasks (Kuchibhotla et al., 2017; Laszlovszky et al., 2020; Parikh et al., 2007; Sturgill  
201 et al., 2020). To determine how BFCN activity dynamics related to appetitive learning and task  
202 performance, we conditioned mice to lick a delivery spout shortly following the onset of a tone  
203 to receive a sugar water reward (**Figure 3A**). To temporally separate the cue, operant motor  
204 response, and reinforcement timing, reward delayed until mice produced an extended,  
205 vigorous bout of licking ( $\geq 7$  licks in 2.8s). Although the rates of procedural learning varied  
206 somewhat between mice (**Figure 3B**), all mice learned the task within a few sessions and  
207 either detected the tone to receive reward (hit) or failed to lick at all in response to the tone  
208 (miss), with very few instances of partial hits ( $>0$  but  $< 7$  licks in 2.8s) observed after the first  
209 few behavioral sessions (**Figure 3C**).

210  
211 We contrasted BFCN activity on hit and miss trials and noted a clear difference, both in the  
212 pre-cue baseline activity and cue-evoked response in HDB (**Figure 3D**) and GP/SI (**Figure**  
213 **3E**). Miss trials featured elevated pre-stimulus BFCN activity levels and reduced sound-evoked  
214 responses (**Figure 3F-G**), where the difference in baseline activity rates between hit and miss  
215 trials was greater overall in HDB than GP/SI (**Figure 3H**). We were surprised to observe that

216 cue-evoked responses were not enhanced later in training, when the cue-reward association  
217 was well-learned (Figure 3F-G). While cue-evoked responses were significantly attenuated on  
218 miss trials, response amplitudes were not significantly changed in either trial type or brain  
219 region as mice learned the association between the auditory cue and reward (**Fig. 3I**).

220

### 221 **Movement-related activity in the cholinergic basal forebrain**

222 To determine how orofacial movements related to licking recruited BFCN activity independent  
223 of sensory cues and reinforcement, we turned to lick events recorded during the inter-trial  
224 interval. Licking behavior during the inter-trial period ranged from spurious checks of the  
225 lickspout, composed of just one or two successive licks, all the way to the occasional  
226 presentation of the operant lick bout behavior (i.e., a false alarm). As illustrated in an example  
227 mouse, we noted a modest increase in BFCN activity beginning shortly after the onset of an  
228 intense lick bout in GP/SI and, to a lesser extent, HDB (**Figure 4A, left column**). We also  
229 observed an unexpected second increase in BFCN activity following the offset of the lick bout  
230 (**Figure 4A, right column**). BFCN response to the onset of licks increased monotonically  
231 across lick bout duration and, while fairly modest overall, were significantly greater in GP/SI  
232 than HDB (**Figure 4B**). By contrast, BFCN responses elicited at the offset of lick bouts were  
233 only observed in bouts of seven or more licks, the criterion for reward delivery had a tone been  
234 presented (**Figure 4C**). In GP/SI, we noted only a minimal response to the offset of  $\geq 7$  licks,  
235 which was not significantly greater than the response to shorter lick bouts. Unlike activity  
236 related to the onset of licking, the offset response was significantly greater in HDB than GP/SI  
237 and was only observed when  $\geq 7$  licks were produced (**Figure 4D-E**). One interpretation of  
238 these findings is that the mouse occasionally deployed the full operant lick behavior during the  
239 silent inter-trial interval in anticipation of reward. In this scenario, the scaling of lick onset and  
240 offset responses with lick duration could corroborate recent findings that BFCNs are more  
241 strongly recruited by motor actions that are expected to result in reward (Crouse et al., 2020),  
242 a possibility that we addressed in the next stage of behavioral experiments.

243

### 244 **Recruitment of BFCN responses to punishment, reward, and reward omission**

245 To address how behavioral reinforcement – and the omission of anticipated reinforcement –  
246 recruited activity in different regions of the BFCN, mice were advanced to the next stage of the  
247 operant training procedure, in which one of the tone frequencies maintained its association  
248 with reward, while the other two frequencies were either switched to reward omission or  
249 punishment (**Figure 5A**). Operant “Go” responses ( $\geq 7$  licks in 2.8s) were initially high to all  
250 tone frequencies following the abrupt change in reinforcement outcome (**Figure 5B**) but mice  
251 gradually reduced Go responses to the tone associated with a neutral outcome to  
252 approximately 40% of trials on average and reduced the Go response to the tone associated  
253 with tongue shock to approximately 25% of trials (**Figure 5C**).

254

255 This arrangement allowed us to contrast BFCN responses in HDB and GP/SI elicited by  
256 reward delivery, reward omission, and punishment (**Figure 5D**). We observed that BFCN  
257 responses to anticipated rewards were very weak in both HDB and GP/SI (**Figure 5E**). The  
258 omission of an anticipated reward was associated with a moderate response in HDB that was

259 significantly greater than both reward delivery response from the same fiber and the reward  
260 omission response in GP/Sl. Delivery of silent, noxious stimulus elicited the strongest BFCN  
261 responses in both regions, although the response to shock was significantly greater in GP/Sl  
262 than HDB (Figure 5E). BFCN response latencies to reward omission were significantly slower  
263 than other reinforcement types (mean  $\pm$  SEM for omission vs. reward and shock;  $1.04 \pm 0.03$   
264 vs.  $0.63 \pm 0.03$  seconds, for HDB and GP/Sl, respectively; **Figure 5F**). The timing of the  
265 reward omission response was more precisely locked to lick bout offset than to timing of when  
266 reward would have been delivered. However, the response is not likely to movement per se,  
267 because activity levels following lick bout cessation were significantly greater on reward  
268 omission trials than on trials where the reward was delivered and consumed (**Figure 5 – figure**  
269 **supplement 1**). Recordings from unidentified basal forebrain neuron types in primates  
270 demonstrate that reward-omission responses only in a sub-type of neurons with slower,  
271 ramping responses (Zhang et al., 2019). Our observation of slower developing omission  
272 responses supports prior descriptions of reward timing and reinforcement prediction error  
273 encoding in BFCNs (Chubykin et al., 2013; Sturgill et al., 2020).

### 274 275 **Learning-related enhancement of punishment-related auditory**

276 Our earlier work used a Pavlovian learning paradigm to identify a transient, selective  
277 enhancement of GP/Sl BFCN spike rates to the conditioned tone frequency that emerged  
278 within minutes of pairing sound with aversive air puffs and a slower, persistent enhancement of  
279 cue-evoked fiber-based GCaMP responses in GP/Sl that emerged one day after the initial  
280 pairing of sounds with foot shock to “fill in” the silent gap separating the auditory cue and the  
281 delayed air puff (Guo et al., 2019). Here, we observed that BFCN responses to reward-  
282 predictive cues were not enhanced over the course of associative learning (Figure 3I). To  
283 reconcile these findings with our prior study, we examined whether auditory cues predicting  
284 aversive stimuli were enhanced as mice learned to change the reinforcement association from  
285 reward to punishment.

286  
287 When compared with pre-reversal responses, cue-evoked responses in HDB remain relatively  
288 constant over the remainder of conditioning, showing no significant differences between  
289 reward-related, omission-related or punishment-related cues or over the course of training  
290 (**Figure 6A**). In GP/Sl, cue-evoked responses for the tone frequency mapped to shock were  
291 enhanced within a few testing sessions following the reversal, while responses to the tone  
292 frequencies associated with reward and reward omission remained relatively stable (**Figure**  
293 **6B**). We repeated the same analysis approach used for the all-appetitive phase of the task by  
294 discretizing behavioral sessions into five time bins based on the fraction of training completed.  
295 These data confirm that sound-evoked responses are greater overall in GP/Sl than HDB but  
296 are not enhanced in either structure for cues associated with anticipated reward or the  
297 unanticipated omission of reward. The only exception was GP/Sl, where cue-evoked  
298 responses increased by approximately 150% as the animal learned the new association  
299 between sound and punishment (**Figure 6C**).

300  
301



302

## Discussion

303 Progress towards understanding basal forebrain contributions to brain function and behavior  
304 has benefited from approaches that support recordings from genetically identified cholinergic  
305 and GABAergic cell types in behaving animals (Yang et al., 2017). Even when experiments are  
306 largely performed on a single species (mice) and focus largely on a single neurochemical cell  
307 type (cholinergic neurons), there have still been inconsistencies in the conclusions drawn from  
308 different experiments, particularly with respect to how BFCN activity relates to movement, to  
309 reward, to conditioned versus unconditioned sensory cues, and to predicting behavioral  
310 outcomes from cue-related activity. We reasoned that this variability could reflect differences in  
311 measurement technique, inter-subject variation, and differences in where the recordings were  
312 made along the extent of the rostrocaudal basal forebrain. To address this possibility, we  
313 developed an approach to study all of the experimental features listed above in each of our  
314 subjects while making simultaneous recordings from rostral and caudal regions of the  
315 cholinergic basal forebrain that are known to have distinct afferent and efferent connections.

316

317 The findings reported here can be summarized by identifying experimental features where  
318 HDB was more strongly involved than GP/ST, where GP/ST was more strongly involved than  
319 HDB, where both structures were equivalently recruited, and where neither structure showed  
320 strong involvement (**Figure 7**). HDB, perhaps on account of its strong reciprocal connectivity  
321 with the prefrontal cortex, showed a stronger involvement than GP/ST on variations of pupil-  
322 indexed internal brain state, in predicting whether the perceptual outcome in a behavioral  
323 detection task was a hit or a miss, and in encoding the omission of anticipated rewards (Gielow  
324 and Zaborszky, 2017; Rye et al., 1984; Zaborszky et al., 2012). Conversely, GP/ST, perhaps on  
325 account of stronger relative inputs from the striatum and thalamic regions encoding nociceptive  
326 inputs and auditory stimuli, showed a stronger functional selectivity for auditory stimuli, self-  
327 initiated movements, punishment, and learning-related plasticity of auditory cues associated  
328 with punishment (Chavez and Zaborszky, 2017; Rye et al., 1984; Zaborszky et al., 2012).

329

### Specialized processing in the caudal tail of the cholinergic basal forebrain

330 Among these statistically significant regional differences, many were differences of degree, but  
331 a few were more akin to differences of kind. In particular, “native” BFCN responses to  
332 unconditioned auditory stimuli were markedly stronger in GP/ST compared with HDB, as was  
333 learning-related enhancement of punishment-predicting auditory cues. Other reports of BFCNs  
334 have either observed that cue-evoked responses only emerge after a learned association with  
335 reward (Crouse et al., 2020; Kuchibhotla et al., 2017; Parikh et al., 2007; Sturgill et al., 2020)  
336 or were not obviously present either for reward- or punishment-predicting cues (Hangya et al.,  
337 2015). Our interpretation is that native responses to unconditioned auditory cues would only be  
338 found in specific regions of the basal forebrain that receive bottom-up inputs from subcortical  
339 nuclei that encode auditory sound features. This includes the extreme caudal tail of the basal  
340 forebrain, GP/ST, where cholinergic neurons receive monosynaptic inputs from the auditory  
341 thalamus and tail of the striatum (Chavez and Zaborszky, 2017) and exhibit well-tuned short-  
342 latency (~10ms) spiking responses to moderate intensity tones and noise bursts (Chernyshev  
343 and Weinberger, 1998; Guo et al., 2019; Maho et al., 1995) as well as the medial septum,  
344

345 where unidentified single units receive inputs from the pontine central gray and also exhibit  
346 short latency auditory responses outside of a learning context, though only to high-intensity  
347 broadband sounds (Zhang et al., 2017). Given that the GP/STN is the predominant source of  
348 BFCN input to lateral neocortical regions including ACtx, one interesting implication is that  
349 unconditioned auditory stimuli occurring outside of a behavioral context should elicit clear ACh  
350 transients in the downstream cortical targets of these neurons. Learning-related cortical  
351 plasticity requires transient neuromodulatory surges and does not occur when stimuli are  
352 presented in a passive context (Froemke, 2015), which underscores the central importance of  
353 mechanisms that not only coordinate properly timed basal forebrain cholinergic release, but  
354 also coordinate other permissive signatures for cortical plasticity and learning, such as BFCN-  
355 cortex synchrony (as characterized during auditory learning (Guo et al., 2019) and attentionally  
356 demanding auditory tasks (Laszlovszky et al., 2020)).

357  
358 As for the learning-related enhancement of punishment-predicting - but not reward-predicting  
359 cues in GP/STN - this again may reflect the unique input this region of the basal forebrain  
360 receives from the medial geniculate and intralaminar thalamic groups, which also exhibit rapid,  
361 selective, and long-lasting enhanced spiking to tones associated with aversive stimuli (Edeline  
362 and Weinberger, 1992; Weinberger, 2011). Learned enhancement of reward-predicting  
363 auditory cues have been observed in more nucleus basalis BFCN axons innervating the  
364 basolateral amygdala (Crouse et al., 2020) and auditory cortex (Kuchibhotla et al., 2017), and  
365 have only been described in putative non-cholinergic neurons in HDB (Lin and Nicolelis, 2008),  
366 which therefore offers no point of contradiction with the absence of reward-related  
367 enhancement reported here in HDB and GP/STN BFCNs. Collectively, these findings point  
368 towards the caudal tail of the basal forebrain, which provides the strongest overall projection  
369 from the basal forebrain to ACtx and where approximately 80% of the neurons are cholinergic  
370 (Guo et al., 2019; Kamke et al., 2005; Rye et al., 1984), as a hub for encoding and associating  
371 sound with aversive, noxious stimuli, and for regulating inhibitory microcircuits within ACtx for  
372 long-term plasticity to enhance the representation of threat-predicting sounds (David et al.,  
373 2012; Guo et al., 2019; Letzkus et al., 2011).

374  
375 Collectively, our findings support the view that the cholinergic basal forebrain broadcasts a  
376 largely homogeneous signal to its distributed downstream targets throughout the brain, yet  
377 regional afferent and efferent connectivity differences – particularly in the caudal tail of the  
378 basal forebrain – support regional specializations for regulating distinct features of global brain  
379 states, behavioral reinforcement, and perceptual salience. Interestingly, a neighboring region  
380 to GP/STN in the tail of the striatum also receive specialized dopaminergic inputs that do not  
381 encode reward value, but rather are activated by potentially threatening sensory stimuli  
382 (Menegas et al., 2018). This raises the interesting suggestion that cholinergic and  
383 dopaminergic signaling in the caudal tail of the striatum, GP, and STN may act differently than  
384 their classic actions elsewhere in the brain, by functioning as a hub for encoding threatening  
385 signals and selecting adaptive threat avoidance behaviors (Watabe-Uchida and Uchida, 2018)

386  
387 **Technical considerations in the interpretation of these findings**

388 To address regional specializations within the cholinergic basal forebrain and minimize inter-  
389 subject variability across a wide range of sensory, motor, internal state, and task-related  
390 variables, we elected to use dual fiber-based chronic calcium imaging in Chat-Cre × GCaMP6f  
391 reporter mice. Using cre-expressing mice for functional characterizations of cholinergic  
392 neurons can be challenging. ChAT<sub>(BAC)</sub>-Cre and ChAT<sub>(IRES)</sub>-Cre homozygous mice exhibit  
393 behavioral irregularities that can be avoided by using ChAT<sub>(IRES)</sub>-Cre hemizygous littermates  
394 (Chen et al., 2018). Ectopic expression in glia and non-cholinergic neurons can also be a  
395 problem, even in popular ChAT<sub>(IRES)</sub>-Cre lines, either because the presence of a *flr*-flanked neo  
396 cassette can result in off-target expression, or because a fraction of glutamatergic neurons  
397 express ChAT transiently during development and would therefore still be labeled with cre-  
398 based transgenic expression approaches (Nasirova et al., 2020). Here, we used hemizygous  
399 offspring from the ChAT-Cre $\Delta$ neo line, in which the neo cassette is removed to reduce ectopic  
400 expression (Nasirova et al., 2020). Although we observed that expression was specific to  
401 ChAT+ neurons in the regions studied here (Figure 1C-D) and closely related to ACh3.0  
402 fluorescence dynamics in a common downstream target (Figure 1H-J), we confirmed aberrant  
403 expression in brain regions outside of the basal forebrain, including both an absence of  
404 GCaMP expression in ChAT+ cells (e.g., in striatal interneurons) and ectopic expression of  
405 GCaMP in ChAT- cells (e.g., in neocortex and hippocampus). Therefore, while a transgenic  
406 reporter strategy was appropriate for our study to produce consistent and selective expression  
407 in two regions of the basal forebrain that were aligned to our fibers, due diligence is required  
408 before attempting selective cholinergic recordings from other brain regions.

409  
410 Another caveat in the interpretation of fiber-based GCaMP imaging is that it provides a bulk  
411 signal that does not distinguish between somatic and neuropil-based calcium signals, nor  
412 between distinct types of BFCNs. That said, from a technical perspective, fiber-based imaging  
413 was clearly the best methodology to address our experimental aims. Efferent HDB axons leave  
414 the basal forebrain in a medial and dorsal orientation, coming nowhere near the GP/SI fiber,  
415 which ensures that each region could be measured independently (Bloem et al., 2014).  
416 Further, BFCNs in GP/SI are arrayed in a thin ventrodorsal sheet along the lateral wall of the  
417 internal capsule and then split into thin vertically oriented arrangements along the medial and  
418 lateral boundaries of the external GP (Clayton et al., 2020; Guo et al., 2019). This anatomy is  
419 not conducive to endoscopic imaging through implanted lenses, as the cells would not be  
420 visualized in a single focal plane and the large lens diameter would impact the internal  
421 capsule. Two-photon imaging of the cortical axon terminals from GP/SI BFCNs is feasible  
422 (Nelson and Mooney, 2016), though these signals would still arise from an indeterminate  
423 number of neurons and concerns about tissue bleaching and photodamage would not be  
424 compatible with the hours of daily testing over 30+ consecutive days that was performed here.  
425 Antidromic or somatic optogenetic tagging of single BFCNs is the gold standard, affording the  
426 highest level of spatial and temporal resolution. Our prior work used the antidromic variant of  
427 this approach to make targeted single unit recordings from GP/SI BFCNs that project to ACtx,  
428 but the yield was punishingly low (~1% of all units recorded) and units could not be held long  
429 enough to measure responses to each of the experimental variables tested here (Guo et al.,  
430 2019).

431

## 432 **Cholinergic regulation of perceptual salience**

433 Although the proportion of cholinergic neurons declines rostral to GP/ST, the overall spatial  
434 arrangement and larger cell body size of BFCNs in nucleus basalis and HDB makes somatic  
435 optogenetic tagging of single units somewhat more feasible (Hangya et al., 2015; Laszlovszky  
436 et al., 2020). An elegant recent study has demonstrated that BFCNs within nucleus basalis and  
437 HDB are not an indivisible class, but can themselves be further sub-divided into bursting and  
438 regular-firing BFCNs, where the proportion of each type varied across the rostral-caudal extent  
439 of the basal forebrain and had distinct patterns of synchronization both with respect to each  
440 other and with network oscillations measured in ACtx (Laszlovszky et al., 2020). Interestingly,  
441 when studied in the context of an auditory task similar to the paradigm used here, the spike  
442 timing of bursting BFCNs showed a stronger coupling with the ACtx on trials where mice made  
443 a Go response (regardless of whether it was a hit or false positive) whereas the regular-firing  
444 BFCNs showed a stronger coupling with the ACtx on trials where mice made the correct  
445 response (regardless of whether it was Go or NoGo).

446

447 Although fiber-based BFCN imaging cannot distinguish between the involvement of each cell  
448 type, we also noted a striking correspondence between GCaMP activity in the peri-tone period  
449 and the subsequent behavioral outcome (either hit or miss, Figure 3H-I). When measuring  
450 spiking of single BFCN units, a relationship to behavioral outcome was only observed in the  
451 period after the auditory cue was delivered, whereas we observed a clear connection to trial  
452 outcome after tone onset but also during the preceding 1s baseline period (thereby obviating  
453 any confound related to differences in licking activity between hit and miss trials). Prior studies  
454 have also reported that cholinergic levels prior to auditory onset can predict whether the animal  
455 would subsequently produce the correct or incorrect operant response, suggesting the bulk  
456 measures may be sensitive to pre-cue dynamics that are not resolvable at the level of single  
457 neurons (Kuchibhotla et al., 2017; Parikh et al., 2007). In a recent study, we found that hit or  
458 miss trial outcomes in a challenging auditory detection task could be predicted from the degree  
459 of synchrony in local networks of ACtx layer 2/3 pyramidal neurons measured from a 1s period  
460 prior to the delivery of the auditory cue (Resnik and Polley, 2021). As the cholinergic basal  
461 forebrain has classically been studied as a master regulator of cortical network synchrony  
462 (Buzsaki et al., 1988; Metherate et al., 1992), one clear suggestion is that ongoing cholinergic  
463 dynamics in the period preceding environmental sensory cues strongly regulate cortical  
464 network state, which can have profound impacts on the accurate encoding of sensory cues  
465 and appropriate selection of cue-directed actions.

466

467

468

## **Materials and Methods**

### **Animals**

470 All procedures were approved by the Massachusetts Eye and Ear Animal Care and Use  
471 Committee and followed the guidelines established by the National Institutes of Health for the  
472 care and use of laboratory animals. Male ChAT-cre- $\Delta$ Neo (homozygous, Jackson Labs



473 031661) and female AI148 mice (hemizygous, Jackson Labs 030328) were bred in house to  
474 generate mice of both sexes for this study. Offspring were therefore hemizygous for ChAT-cre-  
475  $\Delta$ Neo and either had hemizygous expression of cre-dependent GCaMP6f (ChAT+/GCaMP+)  
476 or did not express GCaMP (ChAT+/GCaMP-). Offspring genotypes were confirmed by PCR  
477 (Transnetyx probes) and by histology following perfusion.

478 Experiments were performed in adult mice, 2-3 months of age at the time the first  
479 measurement was performed. Prior to behavioral testing, mice were maintained on a 12 hr  
480 light/12 h dark cycle with ad libitum access to food and water. Mice were grouped-housed  
481 unless they had undergone a major survival surgery. Dual fiber imaging of ChAT neuron  
482 GCaMP fluorescence in GP/Sl and HDB was performed in 11 ChAT+/GCaMP+ mice, four of  
483 which were used for additional histological quantification. Fiber imaging of ACh3.0 sensor  
484 fluorescence in AChT was performed in 10 ChAT+/GCaMP- mice.

485

### 486 **Surgical procedure for GCaMP photometry**

487 Mice were anesthetized with isoflurane in oxygen (5% induction, 2% maintenance) and placed  
488 in a stereotaxic frame (Kopf Model 1900). A homeothermic blanket system was used to maintain  
489 body temperature at 36.6° (FHC). Lidocaine hydrochloride was administered subcutaneously to  
490 numb the scalp. The dorsal surface of the scalp was retracted and the periosteum was removed.  
491 Dual optic fiber implants (Doric, 400 $\mu$ m core 0.48NA, 1.25mm diameter low-autofluorescence  
492 metal ferrule) were slowly lowered into HDB (0.9 x 0.3 x 4.7) and GP/Sl (2.5 x -1.5 x 3.3 mm  
493 from bregma, [lateral x caudal x ventral]) in the right hemisphere. Silicon adhesive (WPI Kwik-  
494 Sil) was applied to the exposed brain surface. The exposed skull surface was prepped with  
495 etchant (C&B metabond) and 70% ethanol before affixing a titanium head plate (iMaterialise) to  
496 the skull with dental cement (C&B Metabond). At the conclusion of the procedure, Buprenex  
497 (0.05 mg/kg) and meloxicam (0.1 mg/kg) were administered and the animal was transferred to  
498 a warmed recovery chamber.

499

### 500 **Surgical procedure for Acetylcholine Sensor Photometry**

501 The initial surgical procedures and perioperative care were similar to that for GCaMP  
502 photometry. The skull overlying the right AChT exposed by moving the temporalis muscle. A burr  
503 hole was made on the temporal ridge at 2.9mm posterior to bregma, using a 31-gauge needle.  
504 A motorized injection system (Stoelting) was used to inject 200nL of AAV9-hSyn-ACh3.0 (diluted  
505 10% in sterile saline from 3.45 x 10<sup>13</sup> genome copies/mL) via a pulled glass micropipette 0.5mm  
506 below the pial surface. We waited at least 10 minutes following the injection prior to withdrawing  
507 the micropipette. A tapered fiber (Optogenix, NA 0.39, diameter 200  $\mu$ m, active length 1.0 mm)  
508 was implanted 1mm below the pial surface and secured using dental cement dyed with India  
509 Ink, which also secured the titanium head plate. Sensor photometry experiments began three  
510 weeks following the injection.

511

### 512 **Pupillometry**



513 Mice were habituated to head-fixation during three sessions of 15, 30, and 60 minutes. Video  
514 recordings of the pupil under iso-luminous background conditions were performed during the  
515 final habituation session and the following sensory characterization day. Video recordings were  
516 made at 30Hz with a CMOS camera (Teledyne Dalsa, model M2020) outfitted with a lens  
517 (Tamron 032938) and infrared longpass filter (Midopt Ip830-25.5). Automated analysis of pupil  
518 diameter follows the procedure described previously by McGinley and colleagues (McGinley et  
519 al., 2015b). Briefly, each movie was thresholded such that most pixel values within the pupil  
520 were below threshold and all other pixels were above threshold. A circle was fit to the pupil by  
521 first calculating the center of mass within the pupil and then centering a circle with the  
522 corresponding area to that point. Canny edge detection was then used to identify edge pixels  
523 within each grayscale image. Edge pixels were removed if they were more than 3 pixels away  
524 from a pupil pixel or outside of an annulus with diameters that were 0.5 and 1.75 the diameter  
525 of the initial fit circle. As a final step, an ellipse was fit to the remaining edge pixels using least-  
526 squares regression and the pupil diameter was defined from the diameter of a circle with a  
527 matching area. This procedure was performed for each image frame using a Matlab  
528 (Mathworks) script adapted from the original publication (McGinley et al., 2015b).

529  
530 Pupil diameter for ACh3.0 sensor imaging experiments was extracted using DeepLabCut  
531 (version 2.1.8.2, (Nath et al., 2019)). Specifically, three investigators each labeled 100 frames  
532 taken from 10 mice, for a total of 300 frames from 30 mice. The four cardinal and four  
533 intercardinal compass points were marked for each pupil. Marker placement was confirmed by  
534 at least one additional investigator. 95% of frames were used for training. We used a ResNet-  
535 101 based neural network with default parameters for 1,030,000 training iterations. We then  
536 used a p-value cutoff of 0.9 to condition the X,Y coordinates for analysis. This network was  
537 then used to analyze videos from similar experimental settings from the ten ACh3.0 sensor  
538 imaging mice. We calculated pupil diameter for each frame by fitting an ellipse to the identified  
539 pupil contour points using a least-squares criterion and calculating the long axis diameter.  
540

## 541 **Operant behavioral testing**

542 All mice proceeded through the same series of tests beginning two weeks following fiber  
543 implant surgery (Figure 2A). On days 1 and 2, mice were habituated to head fixation within the  
544 behavioral test chamber. On day 3, pupillometry was performed without sensory stimulation.  
545 On day 4, pupillometry and fiber imaging was performed in response to the presentation of  
546 auditory or visual stimuli. Beginning on day 5, mice were placed on water restriction and were  
547 monitored until they reached 80% of their baseline weight. Beginning on day 8 or 9, mice  
548 began appetitive operant training that rewarded vigorous licking shortly following the  
549 presentation of three different tone frequencies. Finally, on day 13-22, mice were switched to a  
550 reinforcement reversal task, where two of the previously rewarded frequencies were switched  
551 to neutral or aversive reinforcement. These methods for each of these stages are provided in  
552 detail below.

553

554 Sensory characterization:

555 Visual gratings were generated in Matlab using the Psychtoolbox extension and presented via  
556 an 800 x 480 pixel display (Adafruit 2406) positioned approximately 15cm from the left eye 45  
557 degrees of midline. Visual gratings were presented with a spatial frequency of 0.035 cycles per  
558 degree at three contrasts: 11%, 33%, and 100%. Gratings (2s duration) were presented at  
559 both vertical and horizontal orientations. Spatial drift (2Hz) was imposed along the orthogonal  
560 axis to orientation.

561 Auditory stimuli were either pure tones or auditory drifting gratings (i.e., ripples). Stimuli were  
562 generated with a 24-bit digital-to-analog converter (National Instruments model PXI-4461) and  
563 presented via a free-field speaker (CUI, CMS0201KLX) placed approximately 10 cm from the  
564 left (contralateral) ear canal. Free-field stimuli were calibrated using a wide-band free-field  
565 microphone (PCB Electronics, 378C01). Pure tones were low (either 6 or 6.8 kHz), mid (9.5 or  
566 11.3 kHz), or high (13.9 or 18.5 kHz) frequencies presented at 3 intensities (30, 50, and 70 dB  
567 SPL). Tones were 0.4s duration shaped with 5ms raised cosine onset and offset ramps.  
568 Auditory gratings ranged from 2-45kHz with 2s duration (5ms raised cosine onset and offset  
569 ramps), presented at downward and upward frequency trajectories (at -2 and +2 Hz) at three  
570 intensities (30, 50, and 70 dB SPL). The spectrum was shaped with 20 frequency carriers per  
571 octave that were sinusoidally modulated with 90% depth at 1 cycle per octave.

572 A single block consisted of 22 unique stimulus trials with a 7s inter-trial interval (6 visual  
573 gratings [2 orientations x 3 contrasts], 9 tones [3 frequencies x 3 levels], 6 auditory gratings [2  
574 directions x 3 intensities] and 1 “nothing” trial where neither an auditory nor visual stimulus was  
575 presented). The stimulus order was randomly determined for each of 20 presentation blocks.

576 Operant training:

577 Behavioral shaping for the rewarded tone detection task began immediately following the  
578 sensory characterization session. In the initial phase of training, mice learned to vigorously lick  
579 a spout shortly following tone onset (low-, mid-, or high-frequency, as specified above at 70 dB  
580 SPL) in order receive a liquid reward (10% sucrose in water, 1.5  $\mu$ L per reward, 1 reward per  
581 trial). Initially, tones were paired with rewards (i.e., Pavlovian conditioning), initiated 0.5s after  
582 tone onset.

583 Once mice were reliably licking prior to reward onset, the lick requirement to trigger reward  
584 delivery (i.e., operant conditioning) was progressively increased. The licking criterion to receive  
585 a reward was 7 lickspout contacts within a 2.8s period beginning 0.2s after stimulus onset,  
586 where the interval between any two consecutive licks could not exceed 1s. Individual trials  
587 were scored as hits, according to the criterion above, misses (no licks), or partial hits (lickspout  
588 contact that did not meet the criterion above). Intertrial intervals were determined randomly  
589 from a truncated exponential distribution within a range of 7-10s. Trials were aborted in the  
590 event of lick spout contact in a withhold period of 2s (initial phase) or 1.5s (after reversal)  
591 preceding stimulus onset. Generally, mice learned to produce 7 licks in 2.8s to initiate reward  
592 with low false alarm rates within 2-3 sessions.

593 In order to analyze licking-related activity, separate lick bouts were also selected from the  
594 inter-trial periods without stimuli or reward. Lick bouts were defined as at least two lick contacts  
595 less than 250ms apart, bookended by quiescent lick-free periods at least 1s each before and  
596 after the bout.

597 Once the reward rate exceeded 70% across all frequencies for at least one session, mice were  
598 transitioned to the reversal stage of the operant task in which one of the three tones remained  
599 associated with reward, one was associated with shock, and a third was not associated with  
600 reward or punishment (i.e., neutral outcome). The assignment of tone frequency to  
601 reinforcement condition was randomized across mice. Punishment was delivered by briefly  
602 electrifying the lick spout (0.6mA for 0.4s) once the lick bout threshold (7 licks in 2.8s) had  
603 been crossed. During this stage, the rewarded tone was presented on 50% of trials and the  
604 rewarded and neutral tones were each presented on 25% of trials. Operant testing was  
605 terminated once the Go probability stabilized across all tone frequencies for at least two  
606 consecutive days.

## 607 **Fiber photometry**

### 608 Data acquisition:

609 LEDs of different wavelengths provided a basis for separating calcium-dependent (465 nm)  
610 and calcium-independent (405nm) fluorescence. Blue and purple LEDs were modulated at  
611 210Hz and 330Hz, respectively, and combined through an integrated fluorescence mini-cube  
612 (FMC4, Doric). The power at the tip of the patch cable was 0.1 - 0.2mW. The optical patch  
613 cable was connected to the fiber implant via a zirconia mating sleeve. Bulk fluorescent signals  
614 were acquired with a femtowatt photoreceiver (2151, Newport) and digital signal processor  
615 (Tucker-Davis Technologies RZ5D). The signal was demodulated by the lock-in amplifier  
616 implemented in the processor, sampled at 1017Hz and low-pass filtered with a corner  
617 frequency at 20Hz. The optical fiber were prebleached overnight by setting both LEDs to  
618 constant illumination at a low power (<50uW).

619 Data processing: After demodulation, the 465nm GCaMP responses were calculated as the  
620 fractional change in fluorescence  $DF/F_0$ , where  $F_0$  was defined as the running median  
621 fluorescence value in a 60s time window.  $DF/F_0$  traces were then low-pass filtered with a 2<sup>nd</sup>  
622 order zero-lag Butterworth filter, with a cut-off frequency set to 7Hz. Event-related  $DF/F_0$   
623 values were then z-scored relative to baseline activity levels. For passive sensory  
624 characterization experiments, the baseline distribution consisted of all  $DF/F_0$  recorded during a  
625 2s window preceding visual or auditory stimulus onset. For recordings made during the  
626 operant task, the baseline distribution consisted of all  $DF/F_0$  recorded during a 2s period prior  
627 to auditory cue onset that was combined across trial types and sessions.

628 Data analysis: To measure the relationship with spontaneous pupil fluctuations (Figure 1),  
629 photometry data were first downsampled to 30Hz before measuring coherence with a  
630 hamming window of 1500 samples and 1400 sample overlap. Lag was defined by the peak of  
631 the cross-correlation between fluorescence (GCaMP or ACh3.0) and pupil fluctuations. Event-  
632 related response amplitudes (Figures 2-6) were calculated on an individual trial basis. To

633 measure sensory responses (Figure 2), the mean activity during a 2s baseline period  
634 immediately preceding stimulus onset was subtracted from the peak activity occurring within 2s  
635 following stimulus onset. Responses were averaged over upward and downward auditory  
636 ripples and over vertical and horizontal visual gratings. The amplitude of spontaneous  
637 transients (Figure 2D) were calculated on “nothing trials” (visual blank and auditory silent). A  
638 threshold was applied to  $DF/F_0$  values for each trial to identify time points corresponding to the  
639 bottom 5% of fractional change values. Spontaneous transients were operationally defined as  
640 any time point containing a value that was at least 0.5 z-scores above the 5% threshold.  
641 Spontaneous activity was then quantified as the mean value for all suprathreshold values  
642 within the trial. Time windows used to calculate the various event-related response amplitudes  
643 related to the behavioral task (Figures 3-6) are defined in the corresponding figure legends.

644

## 645 **Histology**

646 At the conclusion of imaging, mice were deeply anesthetized and prepared for transcatheter  
647 perfusion with a 4% formalin solution in 0.1M phosphate buffer. The brains were extracted and  
648 post-fixed at room temperature for an additional 12 hours before transfer to 30% sucrose  
649 solution. In a subset of brains (N=4), coronal sections (30 $\mu$ m) were rinsed for 1 hour in 0.1M  
650 phosphate buffered saline (PBS) and 0.4% Triton-X, and then permeabilized for 1 hour with  
651 1% Triton-X and 5% normal horse serum. Sections were incubated overnight in blocking  
652 solution containing the primary antibodies (Goat anti-ChAT 1:100, Millipore, AB144P). Sections  
653 were rinsed in PBS then incubated for 2 hours at room temperature in blocking solution  
654 containing secondary antibodies, counterstained in DAPI for 5 minutes, rinsed in PBS,  
655 mounted onto glass slides, and then coverslipped. Co-localization of ChAT and GCaMP was  
656 quantified in the HDB and GP/ST regions of interest immediately beneath the tip of the fiber  
657 path and in the corresponding region in the contralateral hemisphere. Regions of interest were  
658 imaged at 63x using a Leica DM5500B fluorescent microscope. Tiled image stacks were then  
659 separated into individual fluorophore channels and labeled cells were manually counted in  
660 each channel independently using Adobe Photoshop.

661

## 662 **Statistics**

663 All statistical analyses were performed in MATLAB 2016b (Mathworks). Data are reported as  
664 mean  $\pm$  SEM unless otherwise indicated. Inflated familywise error rates from multiple  
665 comparisons of the same sample were adjusted with the Holm-Bonferroni correction. Statistical  
666 significance was defined as  $p < 0.05$ .

667

668

## **Acknowledgements**

669 These studies were supported by NIH grant DC009836 (DP), The Nancy Lurie Marks Family  
670 Foundation (DP), a Herchel Smith Harvard Scholarship (BR), a Fondation Zdenek et Michaela  
671 Bakala Scholarship (BR), and NIH grant K08MH116135 (EK).

672

673 BR collected and analyzed the combined calcium imaging, pupillometry and behavioral data.  
674 EK, YW, and TC collected and analyzed the combined ACh3.0 sensor and pupillometry data.  
675 MJ and YL developed the ACh3.0 sensor purchased for use in these experiments. BR and DP  
676 designed the experiments. DP and BR prepared the figures. DP wrote the manuscript, with  
677 input from all authors.

678  
679 We thank Ken Hancock for programming additional changes in his behavioral neurophysiology  
680 data collection software. We thank Matt McGinley for hardware advice and software support  
681 for pupil diameter quantification. We thank Troy Hackett for support developing our  
682 immunolabeling and histology quantification protocols.

683

684

### 685 **Competing interests**

686 The authors declare that no competing interests exist.

687

688

689

690

691

692

693

694

695

696

697

698

699

700

701

702

703

704

705

706

707

708

709

710

711

712

713

714

715



716

## References

- 717 Becket Ebitz, R., and Moore, T. (2019). Both a gauge and a filter: Cognitive modulations of  
718 pupil size. *Front. Neurol.* *10*, 1–14.
- 719 Bloem, B., Schoppink, L., Rotaru, D.C., Faiz, A., Hendriks, P., Mansvelder, H.D., van de Berg,  
720 W.D.J., and Wouterlood, F.G. (2014). Topographic mapping between basal forebrain  
721 cholinergic neurons and the medial prefrontal cortex in mice. *J. Neurosci.* *34*, 16234–16246.
- 722 Buzsaki, G., Bickford, R.G., Ponomareff, G., Thal, L.J., Mandel, R., and Gage, F.H. (1988).  
723 Nucleus basalis and thalamic control of neocortical activity in the freely moving rat. *J.*  
724 *Neurosci.* *8*, 4007–4026.
- 725 Chavez, C., and Zaborszky, L. (2017). Basal forebrain cholinergic-auditory cortical network:  
726 primary versus nonprimary auditory cortical areas. *Cereb. Cortex* *27*, 2335–2347.
- 727 Chen, E., Lallai, V., Sherifat, Y., Grimes, N.P., Pushkin, A.N., Fowler, J.P., and Fowler, C.D.  
728 (2018). Altered baseline and nicotine-mediated behavioral and cholinergic profiles in ChAT-Cre  
729 mouse lines. *J. Neurosci.* *38*, 2177–2188.
- 730 Chernyshev, B. V., and Weinberger, N.M. (1998). Acoustic frequency tuning of neurons in the  
731 basal forebrain of the waking guinea pig. *Brain Res.* *793*, 79–94.
- 732 Chubykin, A.A., Roach, E.B., Bear, M.F., and Shuler, M.G.H. (2013). A cholinergic mechanism  
733 for reward timing within primary visual cortex. *Neuron* *77*, 723–735.
- 734 Clayton, K.K., Williamson, R.S., Hancock, K.E., Tasaka, G., Mizrahi, A., Hackett, T.A., and  
735 Polley, D.B. (2020). Auditory corticothalamic neurons Are recruited by motor preparatory  
736 inputs. *Curr. Biol.* *31*, 1–13.
- 737 Crouse, R.B., Kim, K., Batchelor, H.M., Girardi, E.M., Kamaletdinova, R., Chan, J.,  
738 Rajebhosale, P., Pittenger, S.T., Role, L.W., Talmage, D.A., et al. (2020). Acetylcholine is  
739 released in the basolateral amygdala in response to predictors of reward and enhances the  
740 learning of cue-reward contingency. *ELife* *9*, 1–31.
- 741 David, S. V., Fritz, J.B., and Shamma, S.A. (2012). Task reward structure shapes rapid  
742 receptive field plasticity in auditory cortex. *Proc. Natl. Acad. Sci.* *109*, 2144–2149.
- 743 Disney, A.A., and Higley, M.J. (2020). Diverse spatiotemporal scales of cholinergic signaling in  
744 the neocortex. *J. Neurosci.* *40*, 720–725.
- 745 Do, J.P., Xu, M., Lee, S.H., Chang, W.C., Zhang, S., Chung, S., Yung, T.J., Fan, J.L.,  
746 Miyamichi, K., Luo, L., et al. (2016). Cell type-specific long-range connections of basal  
747 forebrain circuit. *ELife* *5*, 1–18.
- 748 Edeline, J.M., and Weinberger, N.M. (1992). Associative retuning in the thalamic source of  
749 input to the amygdala and auditory cortex: receptive field plasticity in the medial division of the  
750 medial geniculate body. *Behav. Neurosci.* *106*, 81–105.
- 751 Everitt, B.J., and Robbins, T.W. (1997). Central cholinergic systems and cognition. *Annu. Rev.*  
752 *Psychol.* *48*, 649–684.
- 753 Froemke, R.C. (2015). Plasticity of cortical excitatory-inhibitory balance. *Annu. Rev. Neurosci.*  
754 *38*, 195–219.
- 755 Gielow, M.R., and Zaborszky, L. (2017). The Input-Output Relationship of the Cholinergic  
756 Basal Forebrain. *Cell Rep.* *18*, 1817–1830.
- 757 Gritti, I., Henny, P., Galloni, F., Mainville, L., Mariotti, M., and Jones, B.E. (2006). Stereological

- 758 estimates of the basal forebrain cell population in the rat, including neurons containing choline  
759 acetyltransferase, glutamic acid decarboxylase or phosphate-activated glutaminase and  
760 colocalizing vesicular glutamate transporters. *Neuroscience* 143, 1051–1064.
- 761 Guo, W., Robert, B., and Polley, D.B. (2019). The cholinergic basal forebrain links auditory  
762 stimuli with delayed reinforcement to support learning. *Neuron* 103.
- 763 Hangya, B., Ranade, S.P., Lorenc, M., and Kepecs, A. (2015). Central cholinergic neurons are  
764 rapidly recruited by reinforcement feedback. *Cell* 162, 1155–1168.
- 765 Harrison, T.C., Pinto, L., Brock, J.R., and Dan, Y. (2016). Calcium imaging of basal forebrain  
766 activity during innate and learned behaviors. *Front. Neural Circuits* 10, 1–12.
- 767 Jing, M., Li, Y., Zeng, J., Huang, P., Skirzewski, M., Kljatic, O., Peng, W., Qian, T., Tan, K.,  
768 Zou, J., et al. (2020). An optimized acetylcholine sensor for monitoring in vivo cholinergic  
769 activity. *Nat. Methods* 17, 1139–1146.
- 770 Kamke, M.R., Brown, M., and Irvine, D.R.F. (2005). Origin and immunolesioning of cholinergic  
771 basal forebrain innervation of cat primary auditory cortex. *Hear. Res.* 206, 89–106.
- 772 Kim, T., Thankachan, S., McKenna, J.T., McNally, J.M., Yang, C., Choi, J.H., Chen, L., Kocsis,  
773 B., Deisseroth, K., Strecker, R.E., et al. (2015). Cortically projecting basal forebrain  
774 parvalbumin neurons regulate cortical gamma band oscillations. *Proc. Natl. Acad. Sci.* 112,  
775 201413625.
- 776 Kuchibhotla, K. V, Gill, J. V, Lindsay, G.W., Papadoyannis, E.S., Field, R.E., Sten, T.A.H.,  
777 Miller, K.D., and Froemke, R.C. (2017). Parallel processing by cortical inhibition enables  
778 context-dependent behavior. *Nat. Neurosci.* 20, 62–71.
- 779 Laszlovszky, T., Schlingloff, D., Hegedüs, P., Freund, T.F., Gulyás, A., Kepecs, A., and  
780 Hangya, B. (2020). Distinct synchronization, cortical coupling and behavioral function of two  
781 basal forebrain cholinergic neuron types. *Nat. Neurosci.* 23, 992–1003.
- 782 Letzkus, J.J., Wolff, S.B.E., Meyer, E.M.M., Tovote, P., Courtin, J., Herry, C., and Lüthi, A.  
783 (2011). A disinhibitory microcircuit for associative fear learning in the auditory cortex. *Nature*  
784 480, 331–335.
- 785 Li, X., Yu, B., Sun, Q., Zhang, Y., Ren, M., Zhang, X., Li, A., Yuan, J., Madisen, L., Luo, Q., et  
786 al. (2018). Generation of a whole-brain atlas for the cholinergic system and mesoscopic  
787 projectome analysis of basal forebrain cholinergic neurons. *Proc. Natl. Acad. Sci. U. S. A.* 115,  
788 415–420.
- 789 Lin, S.-C.C., and Nicolelis, M.A.L. (2008). Neuronal ensemble bursting in the basal forebrain  
790 encodes salience irrespective of valence. *Neuron* 59, 138–149.
- 791 Lohani, S., Moberly, A.H., Benisty, H., Landa, B., Jing, M., Li, Y., Higley, M.J., and Cardin, J.A.  
792 (2020). Dual color mesoscopic imaging reveals spatiotemporally heterogeneous coordination  
793 of cholinergic and neocortical activity. *BioRxiv* 2020.12.09.418632.
- 794 Maho, C., Hars, B., Edeline, J.M., and Hennevin, E. (1995). Conditioned changes in the basal  
795 forebrain: Relations with learning-induced cortical plasticity. *Psychobiology* 23, 10–25.
- 796 McGinley, M.J., Vinck, M., Reimer, J., Batista-Brito, R., Zagha, E., Cadwell, C.R., Tolias, A.S.,  
797 Cardin, J.A., and McCormick, D.A. (2015a). Waking state: rapid variations modulate neural  
798 and behavioral responses. *Neuron* 87, 1143–1161.
- 799 McGinley, M.J., David, S. V., and McCormick, D.A. (2015b). Cortical membrane potential  
800 signature of optimal states for sensory signal detection. *Neuron* 87, 179–192.

- 801 Menegas, W., Akiti, K., Amo, R., Uchida, N., and Watabe-Uchida, M. (2018). Dopamine  
802 neurons projecting to the posterior striatum reinforce avoidance of threatening stimuli. *Nat.*  
803 *Neurosci.* *21*, 1421–1430.
- 804 Metherate, R., Cox, C.L., and Ashe, J.H. (1992). Cellular bases of neocortical activation:  
805 Modulation of neural oscillations by the nucleus basalis and endogenous acetylcholine. *J.*  
806 *Neurosci.* *12*, 4701–4711.
- 807 Monosov, I.E. (2020). How outcome uncertainty mediates attention, learning, and decision-  
808 making. *Trends Neurosci.* *43*, 795–809.
- 809 Nasirova, N., Quina, L.A., Agosto-Marlin, I.M., Ramirez, J.M., Lambe, E.K., and Turner, E.E.  
810 (2020). Dual recombinase fate mapping reveals a transient cholinergic phenotype in multiple  
811 populations of developing glutamatergic neurons. *J. Comp. Neurol.* *528*, 283–307.
- 812 Nath, T., Mathis, A., Chen, A.C., Patel, A., Bethge, M., and Mathis, M.W. (2019). Using  
813 DeepLabCut for 3D markerless pose estimation across species and behaviors. *Nat. Protoc.*  
814 *14*, 2152–2176.
- 815 Nelson, A., and Mooney, R. (2016). The basal forebrain and motor cortex provide convergent  
816 yet distinct movement-related inputs to the auditory cortex. *Neuron* *90*, 635–648.
- 817 Parikh, V., Kozak, R., Martinez, V., and Sarter, M. (2007). Prefrontal acetylcholine release  
818 controls cue detection on multiple timescales. *Neuron* *56*, 141–154.
- 819 Pisano, F., Pisanello, M., Lee, S.J., Lee, J., Maglie, E., Balena, A., Sileo, L., Spagnolo, B.,  
820 Bianco, M., Hyun, M., et al. (2019). Depth-resolved fiber photometry with a single tapered  
821 optical fiber implant. *Nat. Methods* *16*, 1185–1192.
- 822 Reimer, J., McGinley, M.J., Liu, Y., Rodenkirch, C., Wang, Q., McCormick, D.A., and Tolia, S.  
823 A.S. (2016). Pupil fluctuations track rapid changes in adrenergic and cholinergic activity in  
824 cortex. *Nat. Commun.* *7*, 13289.
- 825 Resnik, J., and Polley, D.B. (2021). Cochlear neural degeneration disrupts hearing in  
826 background noise by increasing auditory cortex internal noise. *Neuron* 1–13.
- 827 Rye, D.B., Wainer, B.H., Mesulam, M.M., Mufson, E.J., and Saper, C.B. (1984). Cortical  
828 projections arising from the basal forebrain: A study of cholinergic and noncholinergic  
829 components employing combined retrograde tracing and immunohistochemical localization of  
830 choline acetyltransferase. *Neuroscience* *13*, 627–643.
- 831 Sarter, M., and Lustig, C. (2020). Forebrain cholinergic signaling: Wired and phasic, not tonic,  
832 and causing behavior. *J. Neurosci.* *40*, 712–719.
- 833 Sturgill, J.F., Hegedus, P., Li, S.J., Chevy, Q., Siebels, A., Jing, M., Li, Y., Hangya, B., and  
834 Kepecs, A. (2020). Basal forebrain-derived acetylcholine encodes valence-free reinforcement  
835 prediction error. *BioRxiv*.
- 836 Teles-Griolo Ruivo, L.M., Baker, K.L., Conway, M.W., Kinsley, P.J., Gilmour, G., Phillips, K.G.,  
837 Isaac, J.T.R., Lowry, J.P., and Mellor, J.R. (2017). Coordinated acetylcholine release in  
838 prefrontal cortex and hippocampus is associated with arousal and reward on distinct  
839 timescales. *Cell Rep.* *18*, 905–917.
- 840 Watabe-Uchida, M., and Uchida, N. (2018). Multiple dopamine systems: Weal and woe of  
841 dopamine. *Cold Spring Harb. Symp. Quant. Biol.* *83*, 83–95.
- 842 Weinberger, N.M. (2011). The medial geniculate, not the amygdala, as the root of auditory fear  
843 conditioning. *Hear. Res.* *274*, 61–74.

- 844 Yang, C., Thankachan, S., McCarley, R.W., and Brown, R.E. (2017). The menagerie of the  
845 basal forebrain: how many (neural) species are there, what do they look like, how do they  
846 behave and who talks to whom? *Curr. Opin. Neurobiol.* 44, 159–166.
- 847 Zaborszky, L., van den Pol, A., and Gyengesi, E. (2012). The basal forebrain cholinergic  
848 projection system in mice. In *The Mouse Nervous System*, C. Watson, G. Paxinos, and L.  
849 Puelles, eds. pp. 684–718.
- 850 Zekveld, A.A., Koelewijn, T., and Kramer, S.E. (2018). The pupil dilation response to auditory  
851 stimuli: current state of knowledge. *Trends Hear.* 22, 1–25.
- 852 Zhang, G., Sun, W., Zingg, B., Shen, L., He, J., Xiong, Y., Tao, H.W., and Zhang, L.I. (2017). A  
853 non-canonical reticular-limbic central auditory pathway via medial septum contributes to fear  
854 conditioning. *Neuron* 97, 406-417.e4.
- 855 Zhang, K., Chen, C.D., and Monosov, I.E. (2019). Novelty, salience, and surprise timing are  
856 signaled by neurons in the basal forebrain. *Curr. Biol.* 29, 134-142.e3.
- 857
- 858
- 859
- 860
- 861
- 862
- 863
- 864
- 865
- 866
- 867
- 868
- 869
- 870
- 871
- 872
- 873
- 874
- 875
- 876
- 877
- 878
- 879
- 880
- 881
- 882
- 883
- 884
- 885



886  
887

## Figures and Figure Legends

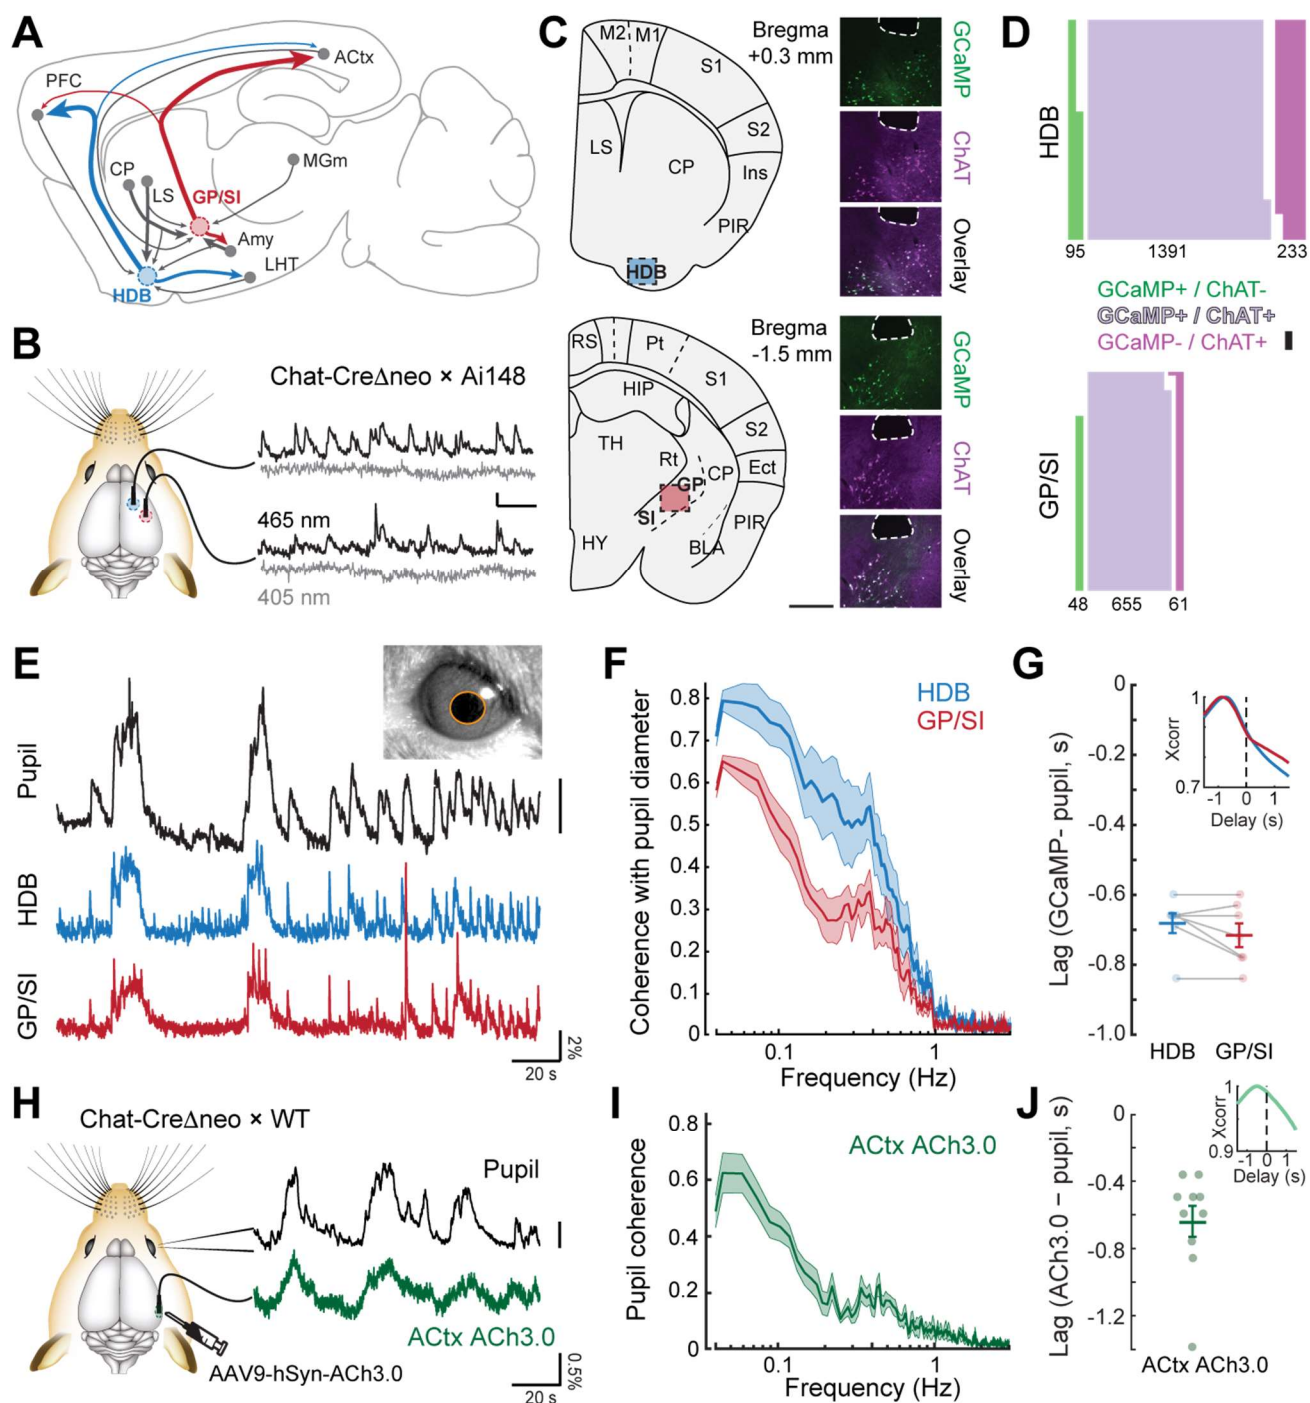

888  
889

890 **Figure 1. Strong, but differential, coherence between pupil-indexed brain state and**  
891 **cholinergic neural activity.**

892 (A) Mid-sagittal diagram of the mouse brain depicting the diversity in major inputs (gray) and  
893 outputs (colored) between a rostroventral basal forebrain structure, the horizontal limb of the  
894 diagonal band (HDB), and the caudodorsal tail of the basal forebrain, the boundary of the  
895 globus pallidus and substantia innominata (GP/SI). ACtx = auditory cortex, MGm = medial



896 subdivision of the medial geniculate body, LHT = lateral hypothalamus, Amy = amygdala, LS =  
897 lateral septum, CP = caudate putamen, PFC = prefrontal cortex.

898 **(B)** Dual bulk fiber-based calcium imaging from basal forebrain cholinergic neurons was  
899 performed from the HDB and GP/SI of ChAT-Cre- $\Delta$ neo  $\times$  Ai148 mice. Dual wavelength  
900 imaging allowed separate visualization of calcium-independent fluorescence (405 nm) from  
901 calcium-dependent fluorescence (465 nm). Vertical and horizontal scale bars reflect 1% DF/F  
902 and 5 seconds, respectively.

903 **(C)** Coronal diagrams illustrate anatomical landmarks at the rostral (top) and caudal (bottom)  
904 imaging locations. Post-mortem fluorescence photomicrographs of brain sections  
905 immunolabeled for the ChAT protein depict the outline of the fiber path and the position of  
906 HDB, GP, and SI. GCaMP and ChAT fluorescence channels and their overlay to illustrate the  
907 strong co-localization of GCaMP in ChAT neurons within HDB and GP/SI regions near the fiber  
908 tip. Scale bar = 0.5mm.

909 **(D)** Cells near the fiber tip were counted based on their expression of GCaMP-only (green),  
910 ChAT-only (magenta), or both GCaMP and ChAT (violet). Numbers indicate the number of  
911 neurons in the corresponding category. Scale bar = 5 neurons.

912 **(E)** Isoluminous spontaneous pupil dilations in an example mouse were visualized in  
913 combination with GCaMP imaging from HDB and GP/SI. Pupil scale bar depicts a 5 pixel<sup>2</sup>  
914 areal change.

915 **(F)** Mean  $\pm$  SEM coherence of HDB and GP/SI GCaMP activity with pupil-indexed brain state  
916 in isoluminous conditions without any explicit environmental stimuli or task demands. N = 7  
917 mice provided data for pupil, HDB, and GP/SI. Basal forebrain GCaMP signals closely track  
918 slow (< 0.5Hz) changes in pupil diameter, though the correspondence is stronger overall in  
919 HDB than in GP/SI (2-way repeated measures ANOVA, main effect for brain structure, F =  
920 12.58, p = 0.01).

921 **(G)** HDB and GP/SI GCaMP changes lead pupil fluctuations by approximately 0.7s. *Inset:*  
922 Cross-correlation of the HDB and GP/SI GCaMP signals with pupil fluctuations. Individual data  
923 points depict the time value corresponding to the peak of the cross-correlograms from  
924 individual mice. Mean  $\pm$  SEM values are provided at left and right.

925 **(H)** Tapered fiber imaging of the ACh3.0 fluorescence during pupil videography. Scale bar  
926 depicts a 5 pixel diameter change.

927 **(I)** Mean  $\pm$  SEM coherence of ACtx ACh3.0 with pupil-indexed arousal in isoluminous  
928 conditions without any explicit environmental stimuli or task demands. N = 10 mice. Pupil  
929 coherence looks qualitatively similar to GP/SI GCaMP coherence, which is expected on  
930 account of its stronger anatomical projection to ACtx.

931 **(J)** ACtx ACh3.0 changes lead pupil fluctuations by approximately 0.6s. *Inset:* Cross-  
932 correlation of the ACtx ACh3.0 signal with pupil fluctuations. Individual data points depict the  
933 time value corresponding to the peak of the cross-correlograms from individual mice. Mean  $\pm$   
934 SEM values are provided at left and right.

935

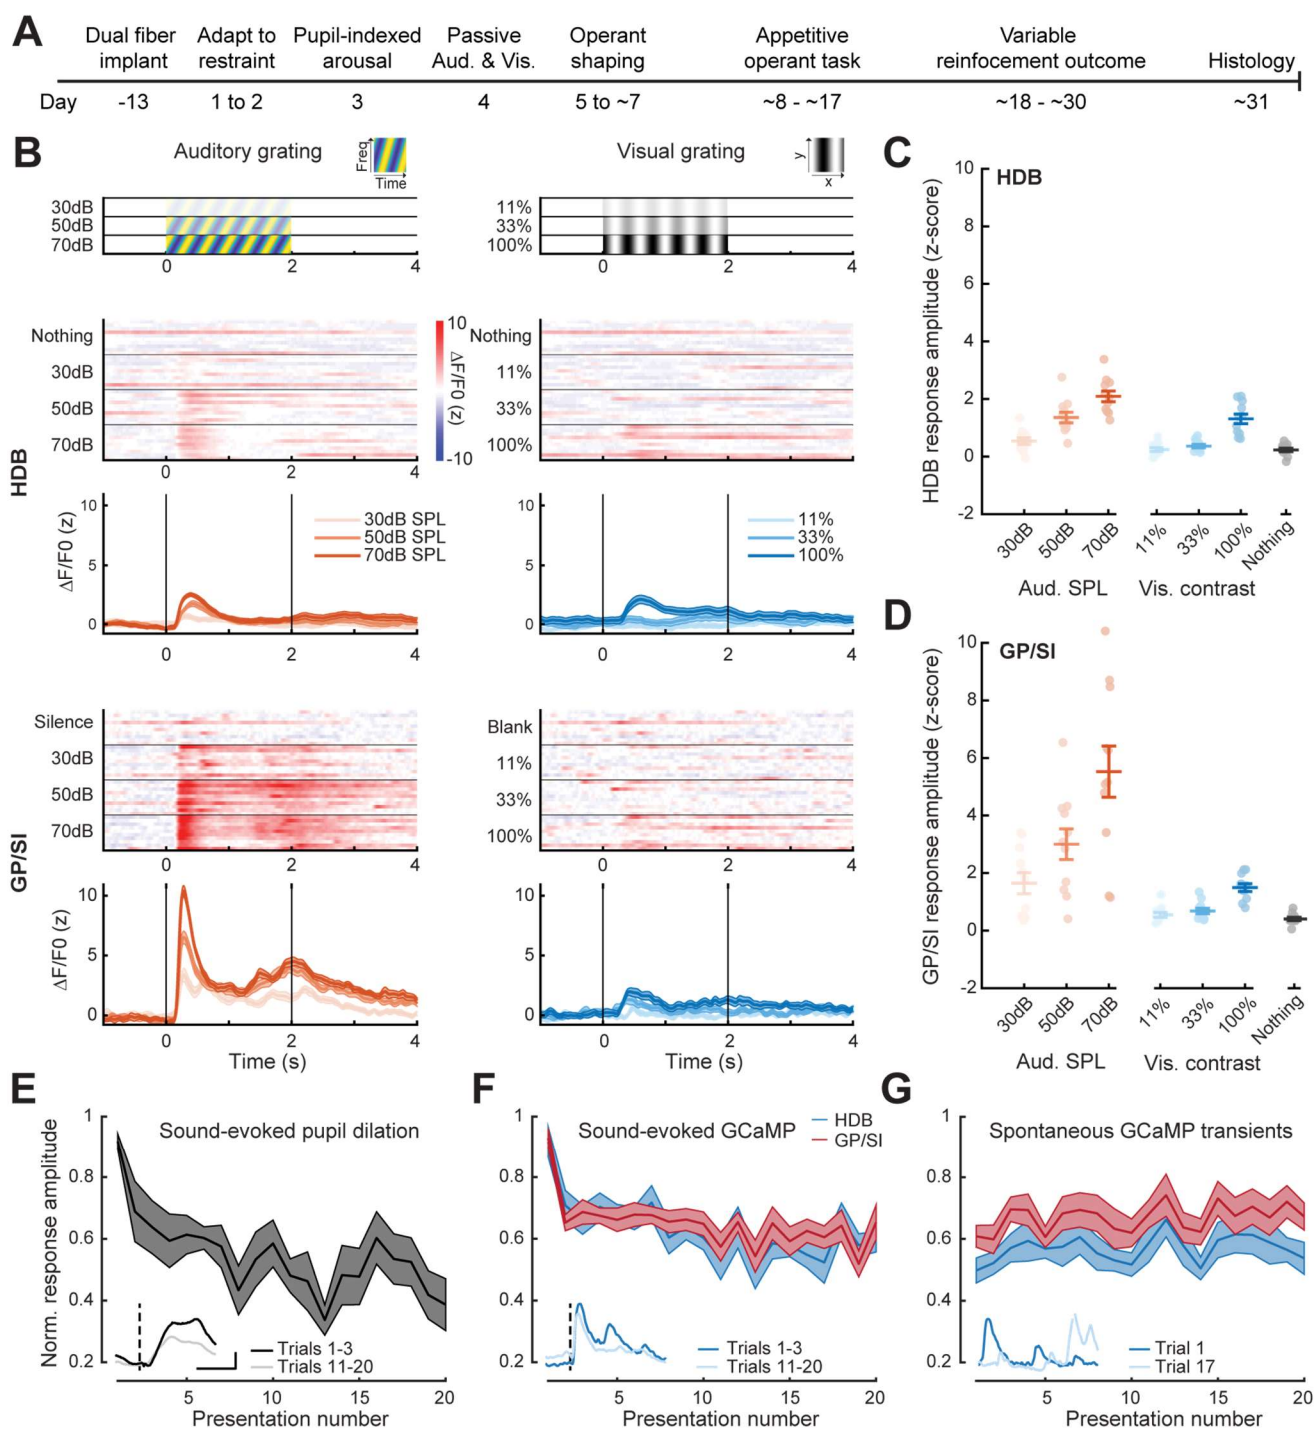

936

937

938 **Figure 2. Strong, rapidly adapting to responses to auditory, but not visual, stimulation**  
 939 **in GP/SI cholinergic neurons.**

940 (A) Timeline for measurements and procedures performed in each of 11 ChAT-Cre-Δneo ×  
 941 Ai148 mice.

942 (B) Sensory-evoked responses to spectrotemporally modulated broadband sounds (i.e.,  
 943 ripples) of varying intensity and drifting visual gratings of varying contrast in an awake,  
 944 passively listening example mouse. Heat maps depict fractional change values for individual

945 trials in HDB (left column) and GP/SI (right column). Line plots depict mean  $\pm$  SEM z-scored  
946 fractional change across all trials. Vertical bars denote stimulus onset and offset.

947 **(C-D)** Z-scored response amplitudes to auditory and visual stimuli in HDB (*B*) and GP/SI (*C*).  
948 Circles denote individual mice (N=11 for all conditions), bars denote sample mean and SEM.  
949 “Nothing” denotes the mean response to silence and blank visual stimuli, which are excluded  
950 from the statistical analysis below. Sensory-evoked cholinergic responses increase with  
951 intensity and contrast, but are stronger overall in GP/SI, particularly in the auditory modality (3-  
952 way repeated measures ANOVA with structure, stimulus level, and modality as independent  
953 variables: Main effect for structure,  $F = 18.74$ ,  $p = 0.001$ ; Main effect for stimulus level,  $F =$   
954  $55.08$ ,  $p = 7 \times 10^{-9}$ ; Main effect for modality,  $F = 17.95$ ,  $p = 0.002$ ; Modality  $\times$  structure  $\times$  level  
955 interaction term,  $F = 10.25$ ,  $p = 0.0009$ ).

956 **(E)** Mean  $\pm$  SEM normalized pupil dilations evoked by 70 dB SPL auditory gratings significantly  
957 decreased over 20 presentations (One-way repeated measures ANOVA,  $F = 2.85$ ,  $p = 0.0003$ ;  
958  $N = 7$  mice). *Inset*: Mean sound-evoked pupil diameter change in an example mouse for trials  
959 1-3 versus 11-20. Inset scale bar = 1 z-score and 2s and applies to all inset panels below.  
960 Vertical dashed line = onset of the 2s stimulus.

961 **(F)** Mean  $\pm$  SEM normalized BFCN response to auditory gratings were significantly and  
962 equivalently reduced in HDB and GP/SI over 20 presentations (2-way repeated measures  
963 ANOVA with structure and presentation number as independent variables: Main effect for  
964 structure,  $F = 0.51$ ,  $p = 0.49$ ; Main effect for presentation number,  $F = 6.11$ ,  $p = 5 \times 10^{-12}$ ;  $N =$   
965 11 mice). *Insets*: Mean response from an HDB fiber of an example mouse for trials 1-3 versus  
966 11-20.

967 **(G)** Mean  $\pm$  SEM normalized BFCN spontaneous GCaMP transient amplitudes did not change  
968 over 20 measurement blocks (2-way repeated measures ANOVA with structure and  
969 presentation number as independent variables: Main effect for structure,  $F = 0.80$ ,  $p = 0.70$ ;  
970 Presentation number  $\times$  structure interaction term,  $F = 0.57$ ,  $p = 0.93$ ;  $N = 11$  mice). *Insets*:  
971 Spontaneous transients from an HDB fiber in two trials for which no stimulus was presented.

972

973

974

975

976

977

978

979

980

981

982

983

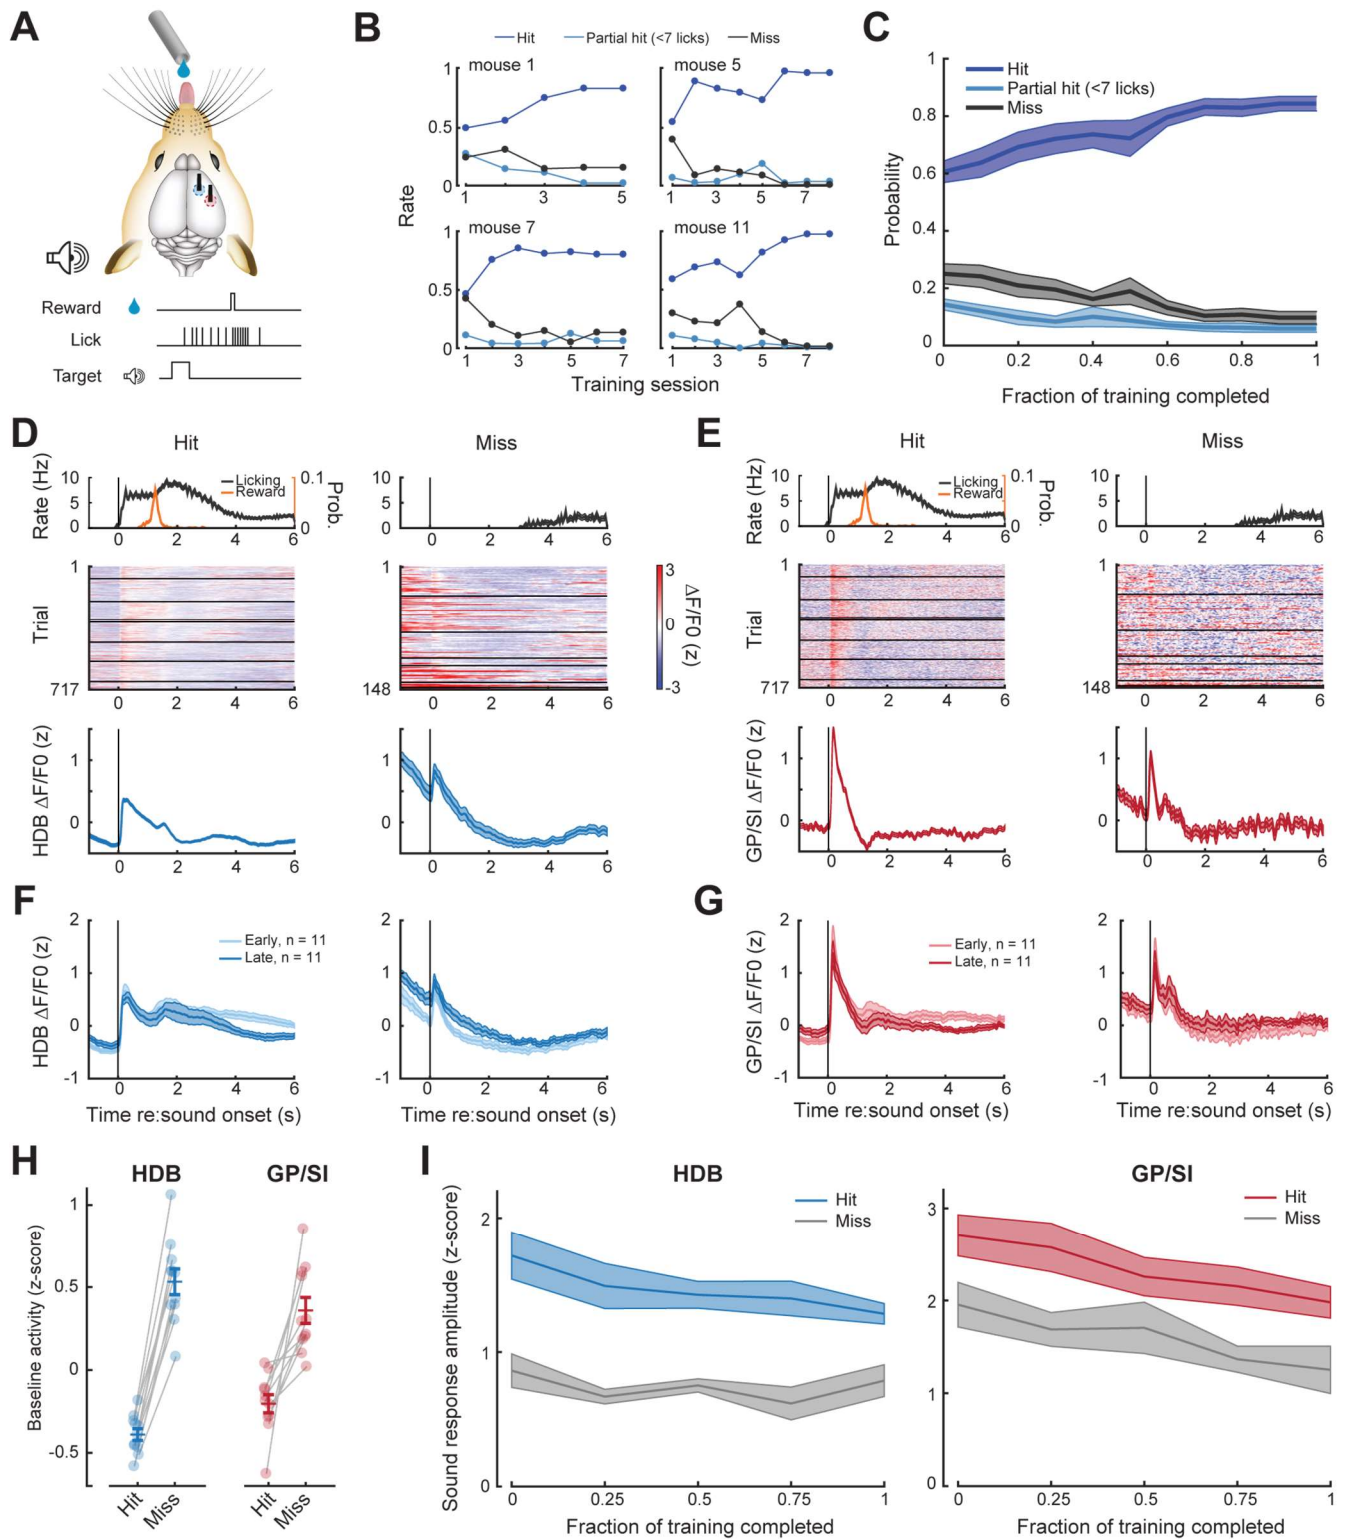

984

985

986 **Figure 3. Pre-stimulus cholinergic basal forebrain activity distinguishes behavioral hit**  
 987 **and miss trials during an auditory detection task.**

988 **(A)** Mice were rewarded for producing a vigorous bout of licking (at least 7 licks in 2.8s) shortly  
 989 after a low-, mid-, or high-frequency tone.



990 **(B)** Learning curves from four example mice that became competent in the detection task at  
991 slightly different rates.

992 **(C)** Mean  $\pm$  SEM probability of hit, partial hit, and miss trial outcome as fraction of training  
993 completed in N = 11 mice.

994 **(D-E)** Tone-evoked cholinergic GCaMP responses from the HDB (*D*) and GP/SI (*E*) of a single  
995 mouse from 717 hit and 148 miss trials distributed over eight appetitive conditioning sessions.  
996 Left columns present the timing of lickspout activity, reward probability, heatmaps single trial  
997 fractional change values, and mean  $\pm$  SEM fractional change values. Right columns present  
998 the same data on miss trials. Horizontal black lines in heatmaps denote different daily  
999 recording sessions. Vertical lines denote tone onset.

1000 **(F-G)** Plotting conventions match *D-E*, except that data are averaged across all mice (N=11)  
1001 and the first third of training trials (early) are plotted separately from the last third of training  
1002 trials (late). No obvious training-related plasticity in the sensory-evoked responses were  
1003 observed.

1004 **(H)** Mean baseline activity during a 1s period preceding stimulus onset on hit and miss trials.  
1005 Circles denote individual mice (N=11 for all conditions), bars denote sample mean and SEM.  
1006 Pre-stimulus baseline activity was significantly higher on miss trials than hit trials, particularly in  
1007 GP/SI (2-way repeated measures ANOVA with trial type and structure as independent  
1008 variables: main effect for trial type,  $F = 102.04$ ,  $p = 1 \times 10^{-6}$ ; trial type  $\times$  structure interaction,  $F$   
1009  $= 7.89$ ,  $p = 0.02$ ).

1010 **(I)** Mean  $\pm$  SEM sound-evoked response amplitudes in all 11 mice were calculated by  
1011 subtracting the mean activity during a 2s pre-stimulus baseline period from the peak of activity  
1012 within 400ms of sound onset. Each post-reversal behavior session was assigned to one of five  
1013 different discrete time bins according to the fraction of total training completed. Although  
1014 sound-evoked responses are reduced on miss trials compared to hit trials, they remain  
1015 relatively stable across all conditions as mice learn to associate neutral sounds with reward (3-  
1016 way repeated measures ANOVA with training time, trial type, and structure as independent  
1017 variables: main effect for training time,  $F = 2.46$ ,  $p = 0.08$ ; main effect for trial type,  $F = 14.74$ ,  $p$   
1018  $= 0.012$ ; training time  $\times$  trial type  $\times$  structure interaction,  $F = 0.56$ ,  $p = 0.7$ ).

1019

1020

1021

1022

1023

1024

1025

1026

1027



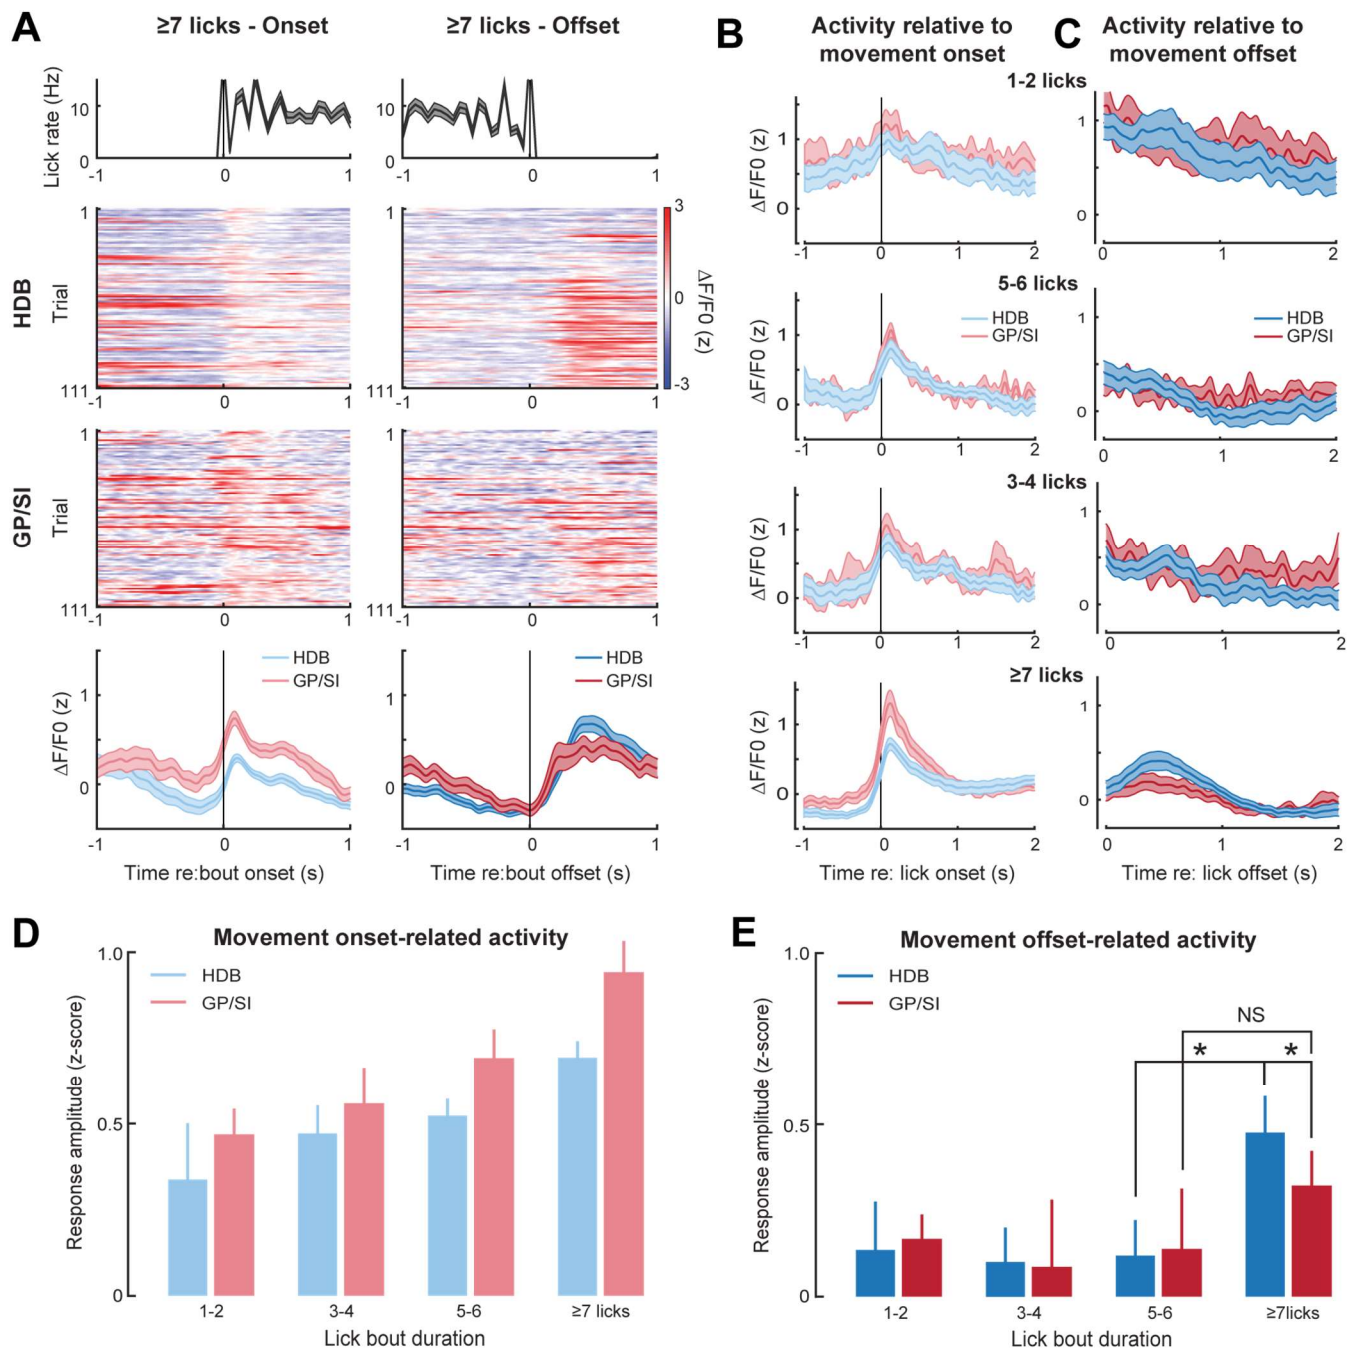

1028

1029

1030

### Figure 4. Motor-related activation of the cholinergic basal forebrain

1031

(A) HDB and GP/SI activity from an example mouse related to the onset (left column) and offset (right column) of vigorous lick bouts during the inter-trial period of the appetitive operant task. Line plots in top and bottom row reflect mean  $\pm$  SEM.

1032

1033

1034

(B-C) Inter-trial lick bouts were binned according to whether they contained 1-2, 3-4, 5-6, or the full 7+ licks that would have produced reward delivery if produced at the appropriate time during the operant task. Mean  $\pm$  SEM activity from N=11 mice related to the onset (B) or offset (C) of different lick bout durations.

1035

1036

1037

1038 **(D)** Response amplitudes related to lick bout onset were calculated by subtracting the  
1039 maximum activity from the 250ms period preceding bout onset from the maximum activity  
1040 occurring within 700ms following lickspout contact. Movement-related responses increased  
1041 with lick bout duration and were greater overall in GP/SI than HDB (2-way repeated measures  
1042 ANOVA with bout duration and structure as independent variables: main effect for bout  
1043 duration,  $F = 6.92$ ,  $p = 0.001$ ; main effect for structure,  $F = 6.33$ ,  $p = 0.03$ ).

1044 **(E)** Response amplitudes related to lick bout offset were calculated by subtracting the  
1045 maximum activity from the 400ms preceding lick bout offset from the maximum activity  
1046 occurring within 700ms following lick spout offset. Overall, the offset of licking did not elicit a  
1047 response (2-way repeated measures ANOVA with bout duration and structure as independent  
1048 variables: main effect for bout duration,  $F = 1.47$   $p = 0.24$ ). In HDB, a response was observed  
1049 at the offset of licking, but only for intense bouts of  $\geq 7$  licks (pairwise post-hoc contrast: 7+ vs  
1050 5-6,  $p = 0.01$ ). No comparable response was observed in GP/SI (pairwise post-hoc contrast:  
1051 7+ vs 5-6,  $p = 1$ ; 7+ GP/SI vs HDB,  $p = 0.03$ ). Asterisks denote pairwise contrast  $p$  values  $<$   
1052 0.05 after correcting for multiple comparisons. NS = not significant.

1053

1054

1055

1056

1057

1058

1059

1060

1061

1062

1063

1064

1065

1066

1067

1068

1069

1070

1071

1072

1073

1074

1075

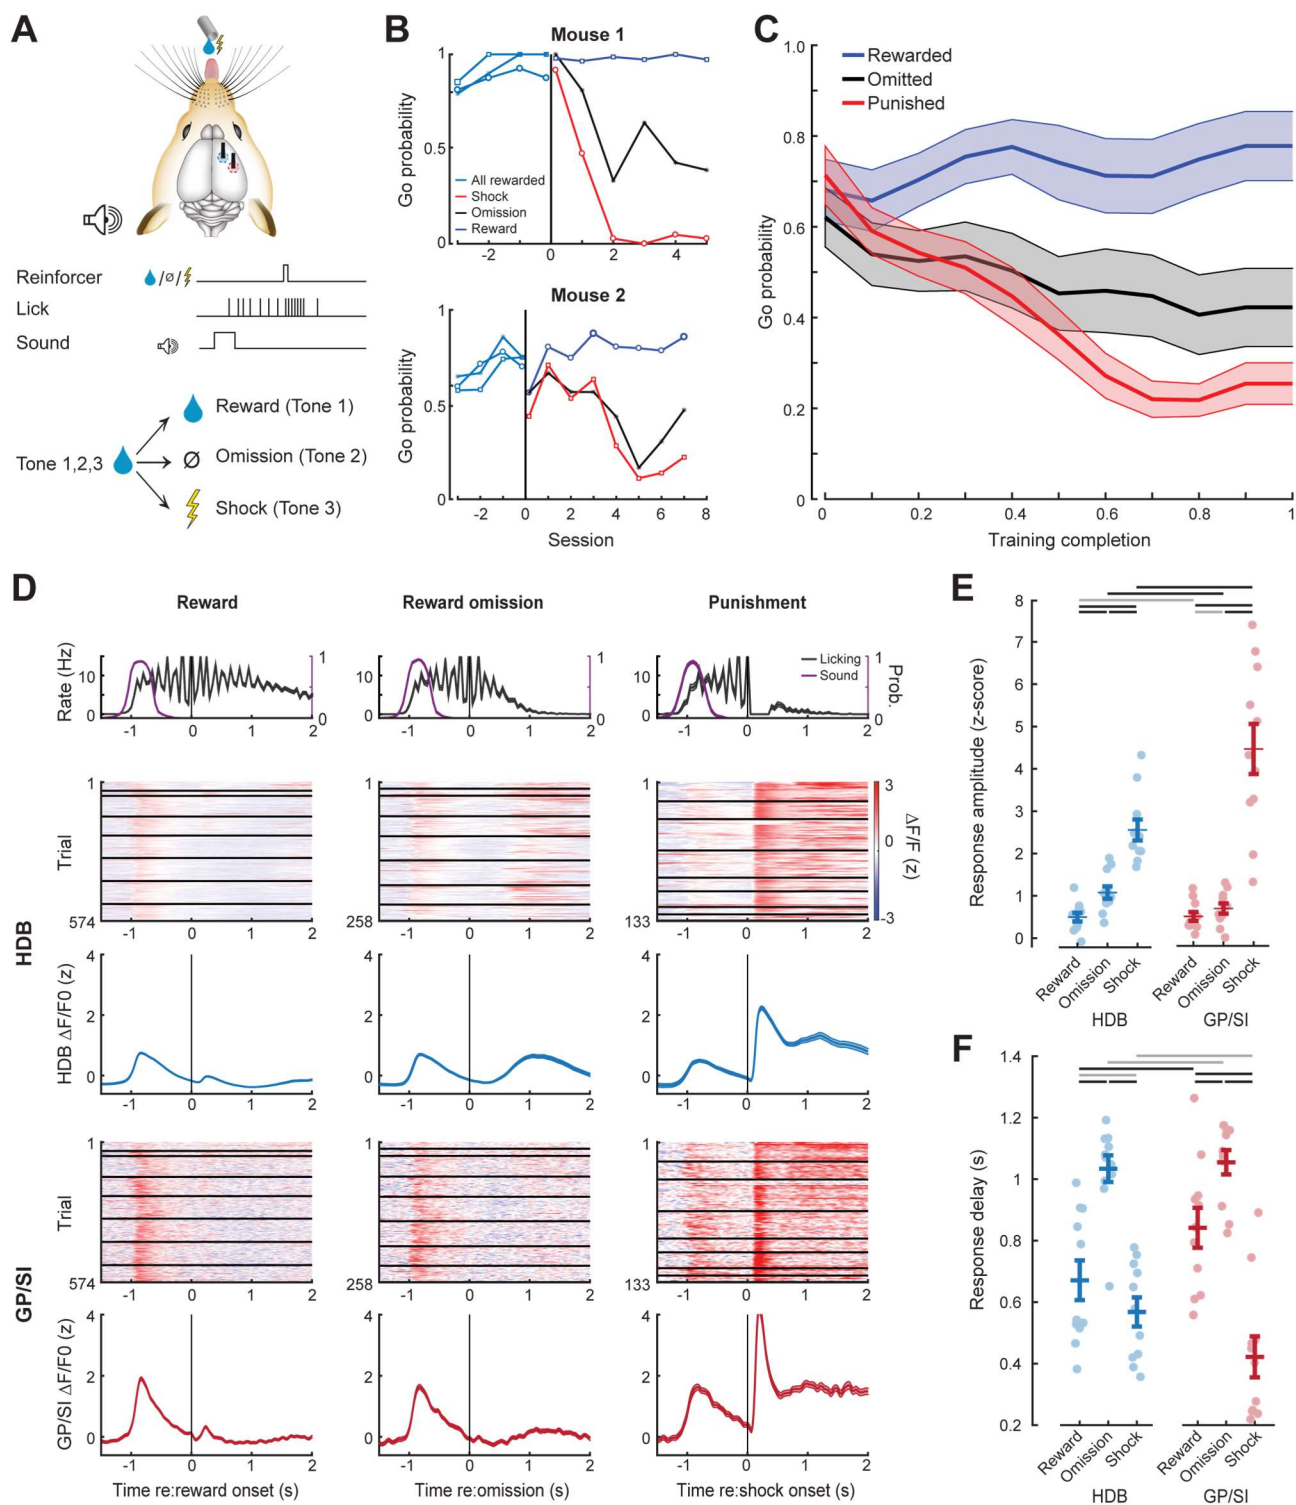

1076

1077

1078

1079

**Figure 5. Differential activation of the rostral and caudal cholinergic basal forebrain in response to reward, punishment, and reward omission.**

1080

1081

1082

(A) Once mice were reliably licking for reward following the onset of the low- mid- or high-frequency tone, the reinforcement outcome was changed such that  $\geq 7$  licks in 2.8s elicited a tongue shock for one frequency and the omission of reward for the other.

1083 **(B)** Go ( $\geq 7$  licks in 2.8s) probability for all three tones when they were all associated with  
1084 reward and after the reinforcement outcome was changed for two of the tones. Data are shown  
1085 for two mice that modify their behavior to the change in reinforcement outcome at different  
1086 rates. Vertical line denotes the transition from all rewarded to differential outcome. Circle,  
1087 asterisk, and squares indicate low-, mid-, and high-frequency tones, respectively.

1088 **(C)** Mean  $\pm$  SEM Go probability for each reinforcement outcome as fraction of training  
1089 completed in N = 11 mice.

1090 **(D)** Tone-evoked cholinergic GCaMP responses from the HDB (*rows 2-3*) and GP/Sl (*rows 4-*  
1091 *5*) of a single mouse from 965 Go trials distributed over eight behavioral sessions following the  
1092 change in reinforcement outcome. All data are plotted relative to reinforcement onset. *Top row:*  
1093 *Timing of lickspout activity (black) and tone onset probability (purple). Rows 2 and 4:* heatmaps  
1094 *of single trial fractional change values in HDB (row 2) and GP/Sl (row 4). Horizontal black lines*  
1095 *in heatmaps denote different daily recording sessions. Rows 3 and 5:* Mean  $\pm$  SEM  
1096 *corresponding to each of the heatmaps above. Vertical lines denote reinforcement onset.*

1097 **(E)** Reinforcement-related response amplitudes were calculated by subtracting the mean  
1098 activity during a 2s pre-stimulus baseline period from the peak activity occurring within 2s  
1099 following the 7<sup>th</sup> lick. Circles denote individual mice (N=11 for all conditions), bars denote  
1100 sample mean and SEM. Two-way repeated measures ANOVA with reinforcement type and  
1101 structure as independent variables: Reinforcement type,  $F = 80.62$ ,  $p = 3 \times 10^{-10}$ ; Structure,  $F =$   
1102  $5.7$ ,  $p = 0.03$ ; Reinforcement type  $\times$  structure interaction,  $F = 8.01$ ,  $p = 0.003$ . Black and gray  
1103 horizontal lines denote significant ( $p < 0.05$ ) and non-significant pairwise contrasts after  
1104 correcting for multiple comparisons.

1105 **(F)** Reinforcement-related response latency were calculated by calculating the mean latency of  
1106 the single trial peak responses relative to the offset of the 7<sup>th</sup> lick. Circles denote individual  
1107 mice (N=11 for all conditions), bars denote sample mean and SEM. Two-way repeated  
1108 measures ANOVA with reinforcement type and structure as independent variables:  
1109 Reinforcement type,  $F = 51.28$ ,  $p = 1 \times 10^{-8}$ ; Structure,  $F = 0.08$ ,  $p = 0.78$ ; Reinforcement type  
1110  $\times$  structure interaction,  $F = 7.52$ ,  $p = 0.004$ . Black and gray horizontal lines denote significant ( $p$   
1111  $< 0.05$ ) and non-significant pairwise contrasts after correcting for multiple comparisons.

1112

1113

1114

1115

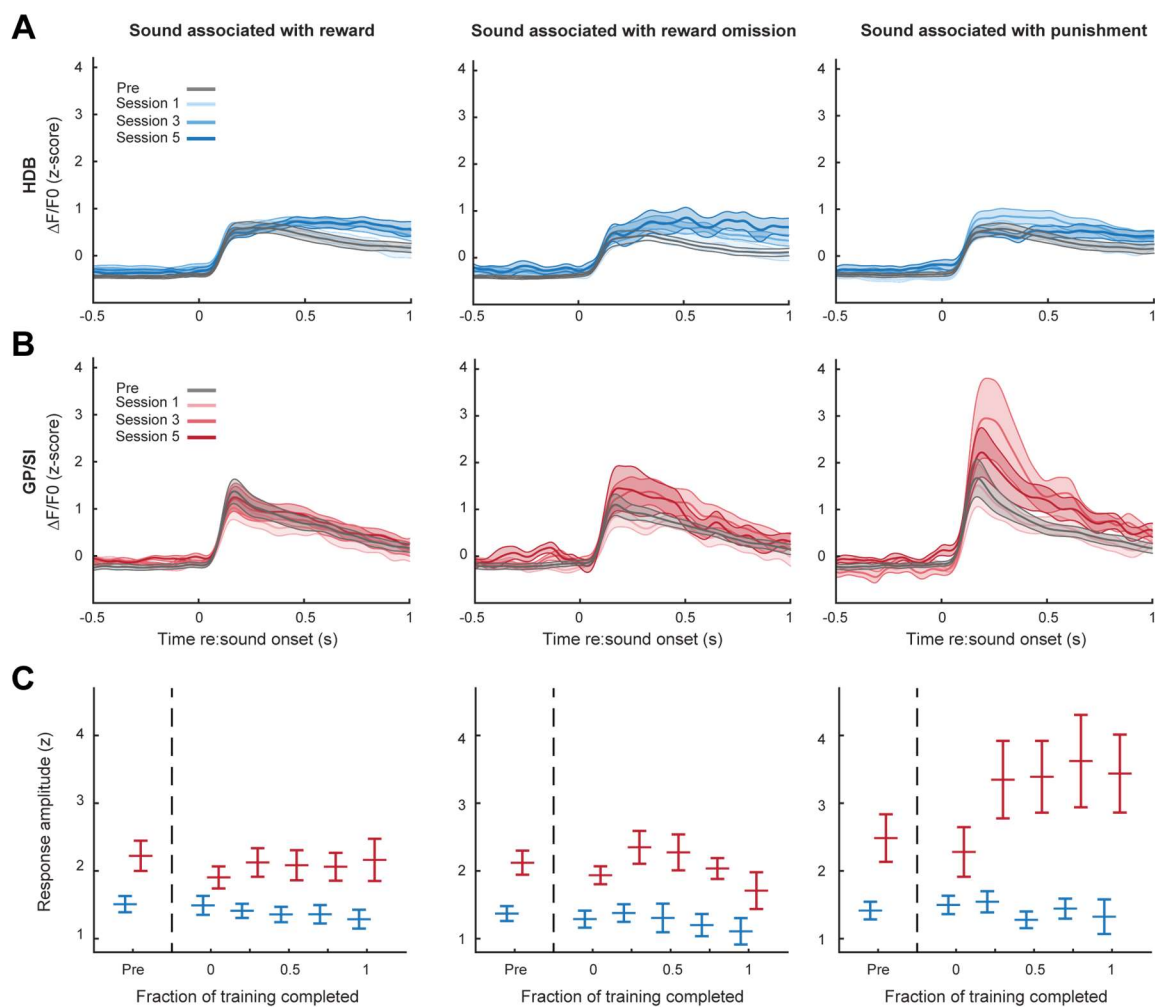

1116

1117

1118 **Figure 6. Learning-related enhancement of the auditory cue response is observed with**  
 1119 **aversive reinforcement, not reward, but only in GP/Sl.**

1120 (A-B) Mean  $\pm$  SEM tone-evoked GCaMP activity in HDB (N=11, A) and GP/Sl (B) for the tone  
 1121 frequency associated with anticipated reward (left column), unanticipated reward omission  
 1122 (middle column) and punishment (right column) during the initial all-rewarded stage of training  
 1123 (gray) and at three sessions following the transition to the variable reinforcement outcome  
 1124 stage.

1125 (C) Mean  $\pm$  SEM sound-evoked response amplitudes in HDB (N=11) and GP/Sl were  
 1126 calculated by subtracting the mean activity during a 2s pre-stimulus baseline period from the  
 1127 peak of activity within 400ms of sound onset. Each post-reversal behavior session was  
 1128 assigned to one of five different discrete time bins according to the fraction of total training  
 1129 completed. Sound-evoked responses were greater overall in GP/Sl than HDB but were only  
 1130 enhanced during reversal learning for the frequency associated with punishment (3-way  
 1131 repeated measures ANOVA with training time, reinforcement type, and structure as  
 1132 independent variables: main effect for training time,  $F = 1.62$ ,  $p = 0.18$ ; main effect for  
 1133 reinforcement type,  $F = 3.99$ ,  $p = 0.03$ ; main effect for structure,  $F = 23.38$ ,  $p = 0.0006$ ; training  
 1134 time  $\times$  reinforcement type  $\times$  structure interaction,  $F = 2.2$ ,  $p = 0.04$ ).

1135



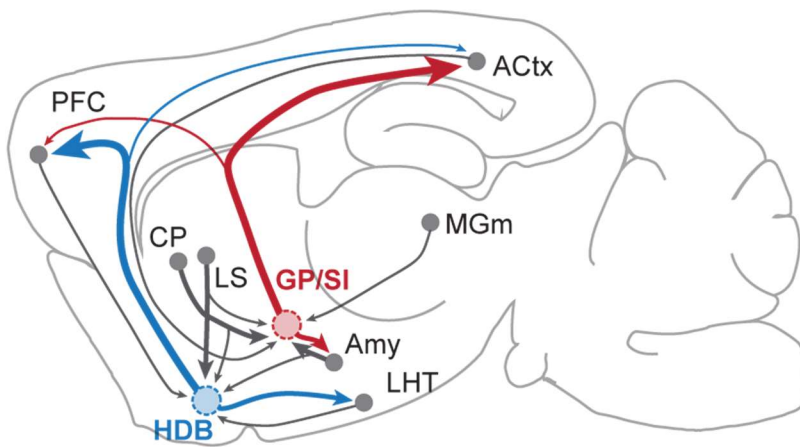

| Experimental variable                                      | Relative involvement |
|------------------------------------------------------------|----------------------|
| Pupil-indexed arousal (Fig. 1)                             | HDB > GP/SI          |
| Predicting perceptual outcome (Fig. 3)                     | HDB > GP/SI          |
| Reinforcement - reward omission (Fig. 5)                   | HDB > GP/SI          |
| Passive sensory - auditory (Fig. 2)                        | GP/SI > HDB          |
| Licking / Orofacial movement (Fig. 4)                      | GP/SI > HDB          |
| Reinforcement - punishment (Fig. 5)                        | GP/SI > HDB          |
| Learning-related sensory plasticity - punishment (Fig. 6)  | GP/SI > HDB          |
| Adaptation to stimulus novelty (Fig. 2)                    | Equivalently strong  |
| Passive sensory - visual (Fig. 2)                          | Equivalently weak    |
| Reinforcement - reward (Fig. 5)                            | Equivalently weak    |
| Learning-related sensory cue enhancement - reward (Fig. 3) | Equivalently weak    |

1136

1137

1138

1139

1140

1141

1142

1143

1144

1145

**Figure 7. Summary of functional specializations between the rostral and caudal basal forebrain.** A summary of the relative involvement of HDB and GP/SI across all experimental variables tested here.

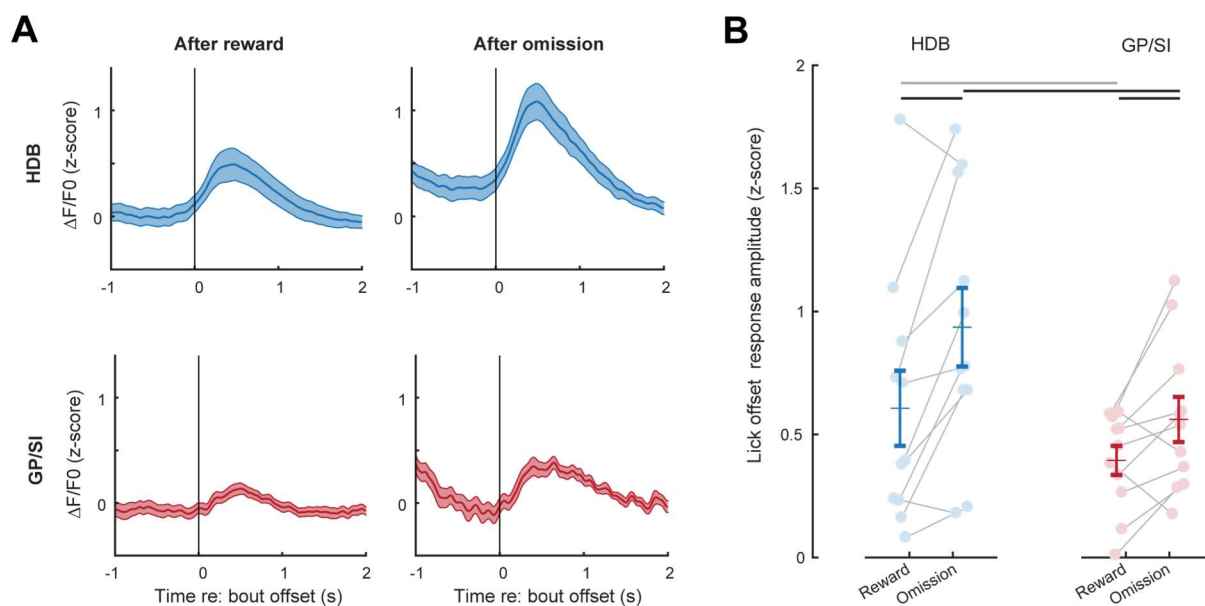

1146

1147

1148

1149

**Figure 5 – figure supplement 1. Summary of functional specializations between the rostral and caudal basal forebrain.**

1150

(A) Mean  $\pm$  SEM tone-evoked GCaMP activity in HDB and GP/SI (N=11 mice) relative to the offset of licking on rewarded (left column) and omission (right column) trials.

1151

1152

(B) Response amplitudes in reward and omission trials were calculated by subtracting the maximum activity from the 400ms preceding lick bout offset from the maximum activity occurring within 700ms following lick spout offset. Circles denote individual mice (N=11 for all conditions), bars denote sample mean and SEM. Lick bout offset responses were greater in HDB overall and significantly greater in omission trials than rewarded trials suggesting that they reflect reward prediction error and not a motor-related signal (2-way repeated measures ANOVA with trial type and structure as independent variables: main effect for trial type,  $F = 10.97$ ,  $p = 0.007$ ; main effect for structure,  $F = 8.55$ ,  $p = 0.02$ . Black and gray horizontal lines denote significant ( $p < 0.05$ ) and non-significant pairwise contrasts after correcting for multiple comparisons.

1153

1154

1155

1156

1157

1158

1159

1160

1161

1162
